# Supplementary material for: BEAR reveals that increased fidelity variants can successfully reduce the mismatch tolerance of adenine but not cytosine base editors
Source: PubMed Central journal article supplement (PMC8566456; doi:10.1038/s41467-021-26461-y), 2021-11-03
Supplement: 41467_2021_26461_MOESM1_ESM.pdf [file 41467_2021_26461_MOESM1_ESM.pdf]

# Supplementary Information

for

## **BEAR reveals that increased fidelity variants can successfully reduce the mismatch-tolerance of adenine but not cytosine base editors**

András Tálas\*, Dorottya A. Simon, Péter I. Kulcsár, Éva Varga, Sarah L. Krausz, Ervin Welker\*

\* Corresponding author. E-mail: [talas.andras@ttk.hu](mailto:talas.andras@ttk.hu), [welker.ervin@ttk.hu](mailto:welker.ervin@ttk.hu)

### **Contents:**

|                                                                                                                                                      |    |
|------------------------------------------------------------------------------------------------------------------------------------------------------|----|
| Supplementary Figure 1 – Canonical and non-canonical splice donor sites examined in BEAR.....                                                        | 2  |
| Supplementary Figure 2 – Splice site variants for identifying candidate BEAR sequences in N2a cells.....                                             | 2  |
| Supplementary Figure 3 – Versatility of BEAR allows its compatibility with different sequences.....                                                  | 3  |
| Supplementary Figure 4 – Enrichment of base edited cells with nickase ABE .....                                                                      | 4  |
| Supplementary Figure 5 – Scatter plots of the editing efficiencies of ABE and CBE variants .....                                                     | 5  |
| Supplementary Figure 6 – Activity of base editor variants with 50 mismatching sgRNAs.....                                                            | 5  |
| Supplementary Figure 7 – Off-target activities of different ABE variants on three additional targets with 1<br>matched and 31 mismatched sgRNAs..... | 6  |
| Supplementary Figure 8 – The activities of ABE8e variants are more similar to CBE than to ABE.....                                                   | 8  |
| Supplementary Figure 9 – Bystander editing of ABE8e .....                                                                                            | 9  |
| Supplementary Figure 10 – The on-target activity of dABE barely correlates with evo- or HeF-ABE .....                                                | 9  |
| Supplementary Figure 11 – Flow cytometry gating examples.....                                                                                        | 11 |
| Supplementary Methods – Detailed plasmid construction.....                                                                                           | 13 |
| Supplementary Table 1 – Comparison of seven fluorescence-based markers of base editing.....                                                          | 17 |
| Supplementary Table 2 – List of oligonucleotides.....                                                                                                | 18 |
| Supplementary Table 3 – List of NGS primers and NGS indexing .....                                                                                   | 31 |

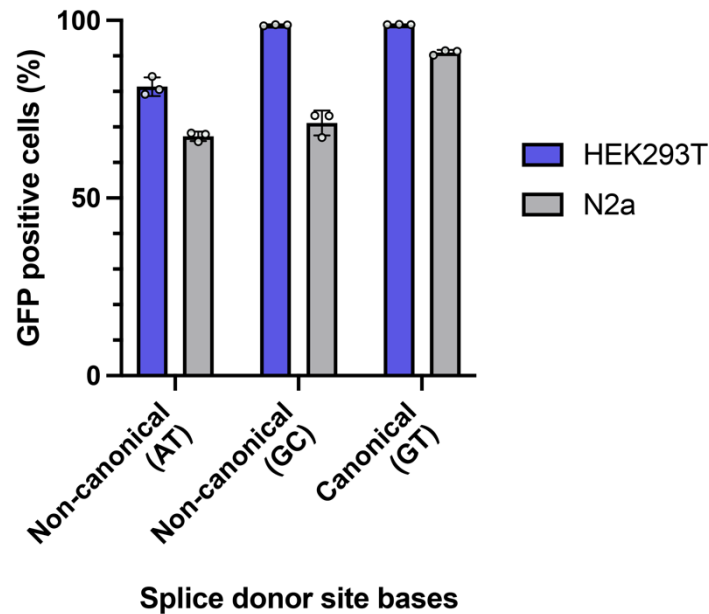

**Supplementary Figure 1 – Canonical and non-canonical splice donor sites examined in BEAR**

Canonical (GT) or non-canonical (AT or GC) splice donor sites were inserted into the split GFP coding plasmid (**Fig. 1**) and were transformed either into HEK293T (blue) or N2a (grey) cells. Columns represent means +/- SD of three parallel transfections (grey circles).

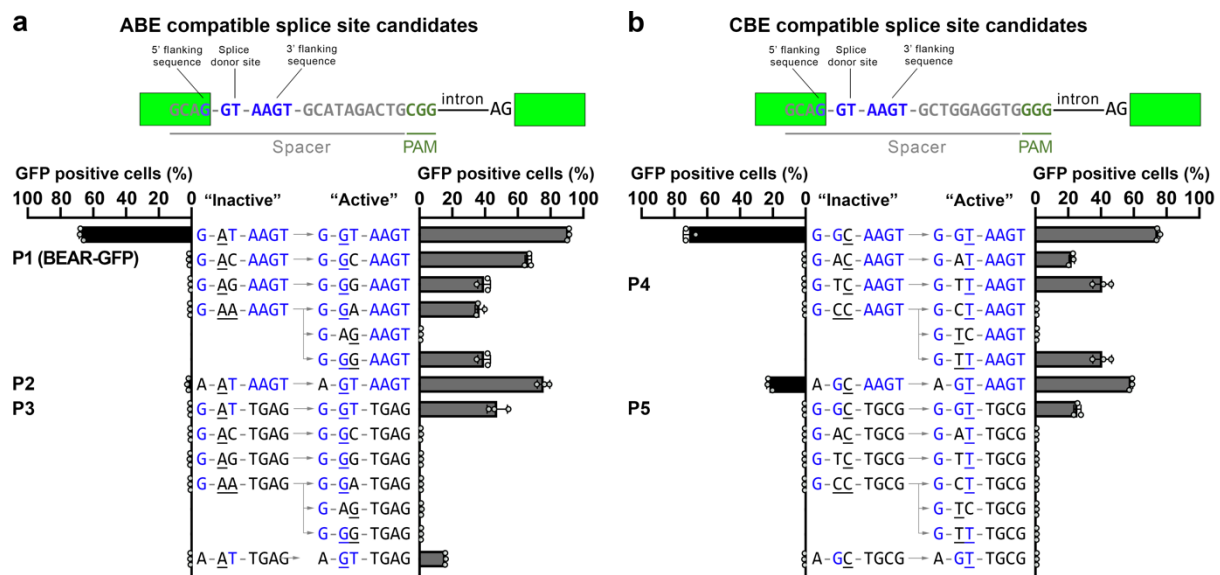

**Supplementary Figure 2 – Splice site variants for identifying candidate BEAR sequences in N2a cells**

Flow cytometry measurements of GFP positive N2a cells, transfected with plasmids harbouring systematically altered splice sites (expected “inactive” sequences), which can be converted by ABE (**a**) or CBE (**b**) to sequences expected to be functional, “active” splice sites. The sequences between the column charts represent the intended “inactive” or “active” splice site sequence pairs. Letters highlighted in blue indicate the bases that correspond to the canonical splice donor site and the flanking sequences: 5' - G GT AAGT - 3' (upper panels); the altered bases to be edited in the splice sites are

underlined. Five sequence pairs (P1-P5) with minimal fluorescence for the inactive and maximal fluorescence for the active splice donor site were selected for further analyses as detailed in **Fig. 2c-e**. Columns represent means, +/- SD of three parallel transfections (grey circles).

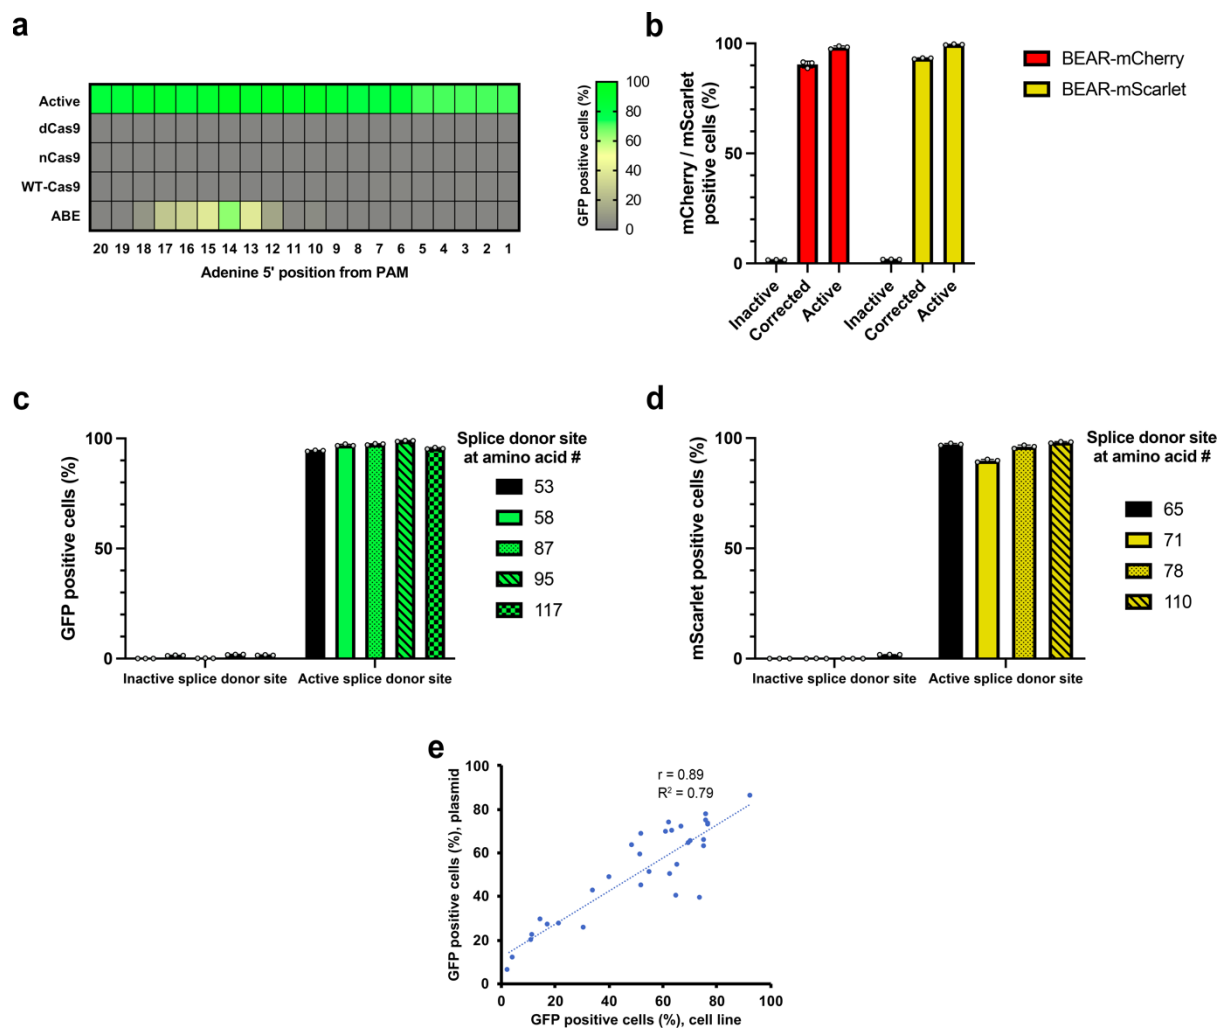

### Supplementary Figure 3 – Versatility of BEAR allows its compatibility with different sequences

(a) Heatmap showing the percentage of GFP positive HEK293T cells transfected with various constructs, in which the PAM motif is shifted in relation to the base to be edited so that the edited base can occupy any position along the spacer sequence, thus, the editing window of ABE can be monitored. Each spacer contains only one adenine base and that adenine is the target. As a positive control for each edited position, a plasmid with an active splice site was constructed. As negative controls, constructs with inactive splice donor sites were co-transfected with the corresponding sgRNAs and either dead, nickase or nuclease (WT) SpCas9. Data is derived from three parallel transfections.

(b) HEK293T cells were transfected with plasmids harbouring an inactive splice site along with ABE (corrected) or along with nSpCas9 as negative control (inactive). As positive controls, plasmids with active splice sites were also transfected to monitor the maximum theoretical extent of base editing. BEAR-mCherry (red) and BEAR-mScarlet (yellow) contain the exact same intron and splice site that were used with BEAR-GFP. Columns represent means +/- SD of three parallel transfections (grey circles).

HEK293T cells are transfected with plasmids harbouring a GFP (c) and mScarlet (d) sequence interrupted with the intron at different amino acid positions within their sequence as indicated in the figure. All constructs expressed high levels of GFP and mScarlet, with all intron positions. Columns represent means  $\pm$  SD of three parallel transfections (grey circles).

(e) Scatter plot of GFP positive cells measured either when the BEAR-GFP plasmid or the BEAR-GFP cell line was edited with one matching and 32 mismatching sgRNAs (Pearson's  $r=0.89$ ).

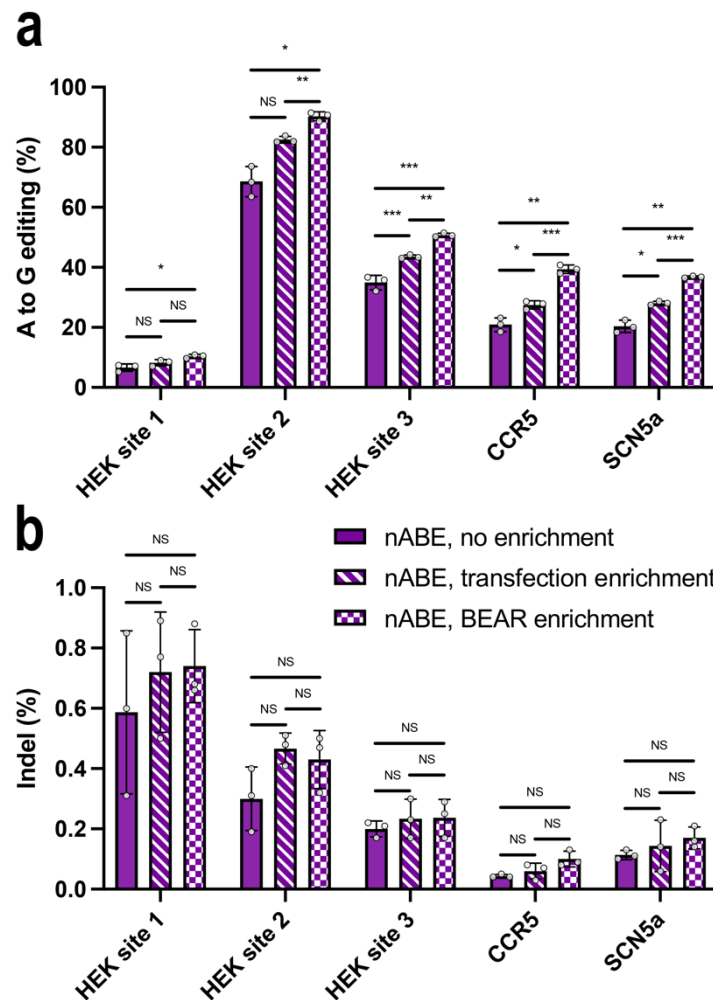

#### Supplementary Figure 4 – Enrichment of base edited cells with nickase ABE

The BEAR-GFP-2in1 plasmid and endogenous genomic targets were co-edited by nABE and analysed by NGS. Edited cells were sorted to 3 fractions: all cells (no enrichment, plain purple), BFP positive cells (transfection enrichment, striped purple), and cells with GFP positivity representing base editing enriched cells (BEAR enrichment, chequered purple). Base editing (a) and indel formation (b) were quantified from the same samples. Columns represent means  $\pm$  SD of three parallel transfections (grey circles). Differences between samples were tested using one-way ANOVA. NS: $p>0.05$ , \*: $p<0.05$ , \*\*: $p<0.01$ , \*\*\*: $p<0.001$ . For source data and exact p-values see Supplementary Data.

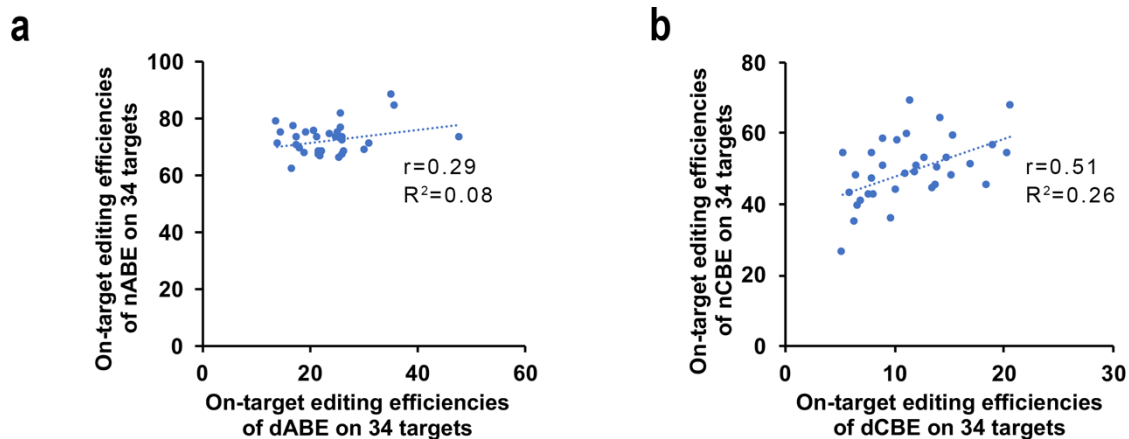

**Supplementary Figure 5 – Scatter plots of the editing efficiencies of ABE and CBE variants**

(a) Scatter plot for 34 on-target editing results (see **Figure 5**) when the nuclease inactive (dABE) and nickase ABE (nABE) are compared (Pearson’s  $r=0.29$ ).

(b) Scatter plot for 34 on-target editing results (see **Figure 5**) when the nuclease inactive (dCBE) and nickase CBE (nCBE) are compared (Pearson’s  $r=0.51$ ).

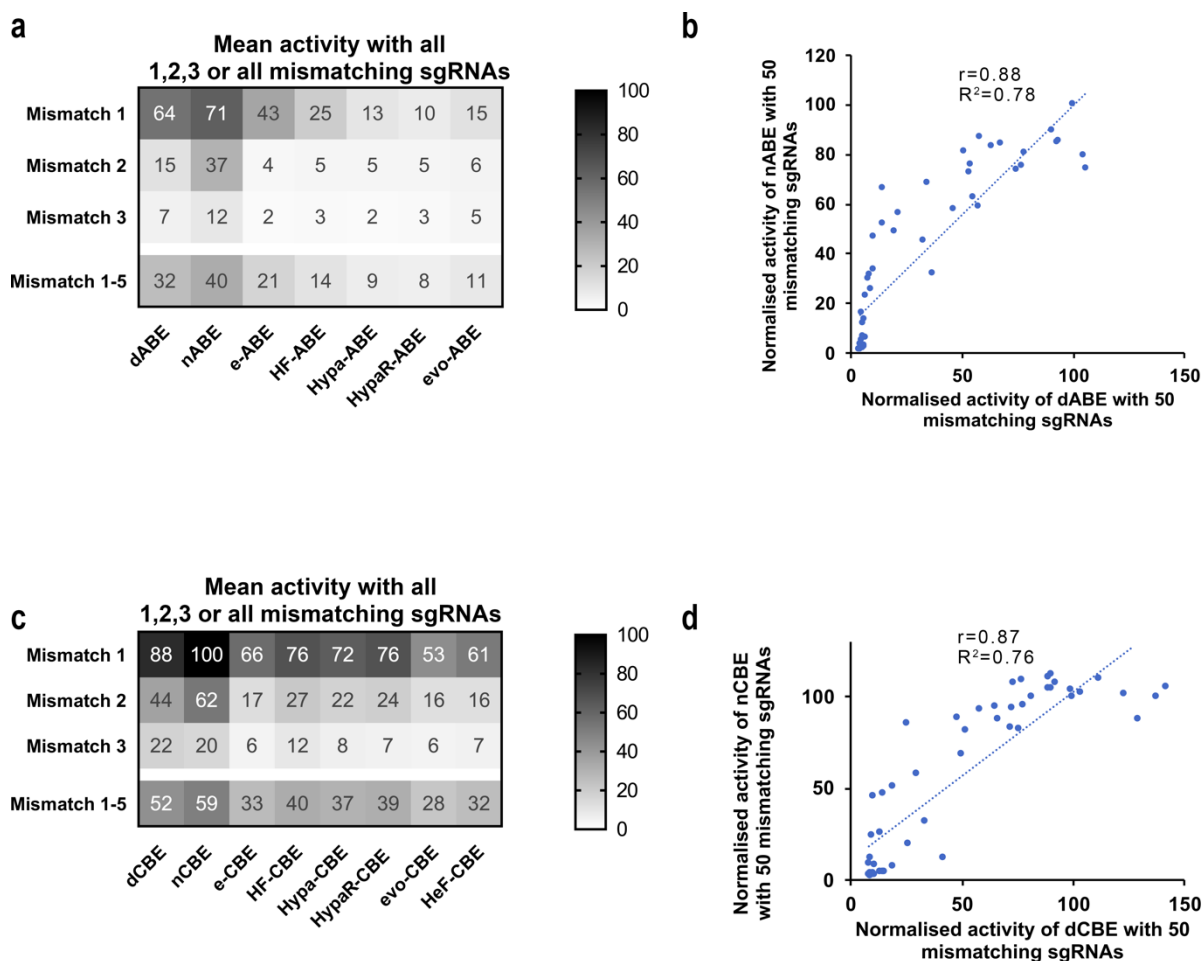

**Supplementary Figure 6 – Activity of base editor variants with 50 mismatching sgRNAs**

- (a) Mean activity of different ABE variants with all 1, 2, 3 or all (1-5) mismatching sgRNAs that are shown in **Figure 6**.
- (b) Scatter plot of editing activities of dABE and nABE on 50 mismatching sgRNAs that are shown on **Figure 6** (Pearson's  $r = 0.88$ ).
- (c) Mean activity of different CBE variants with all 1, 2, 3 or all (1-5) mismatching sgRNAs that are shown in **Figure 6**.
- (d) Scatter plot of editing activities of dCBE and nCBE on 50 mismatching sgRNAs that are shown on **Figure 6** (Pearson's  $r = 0.87$ ).

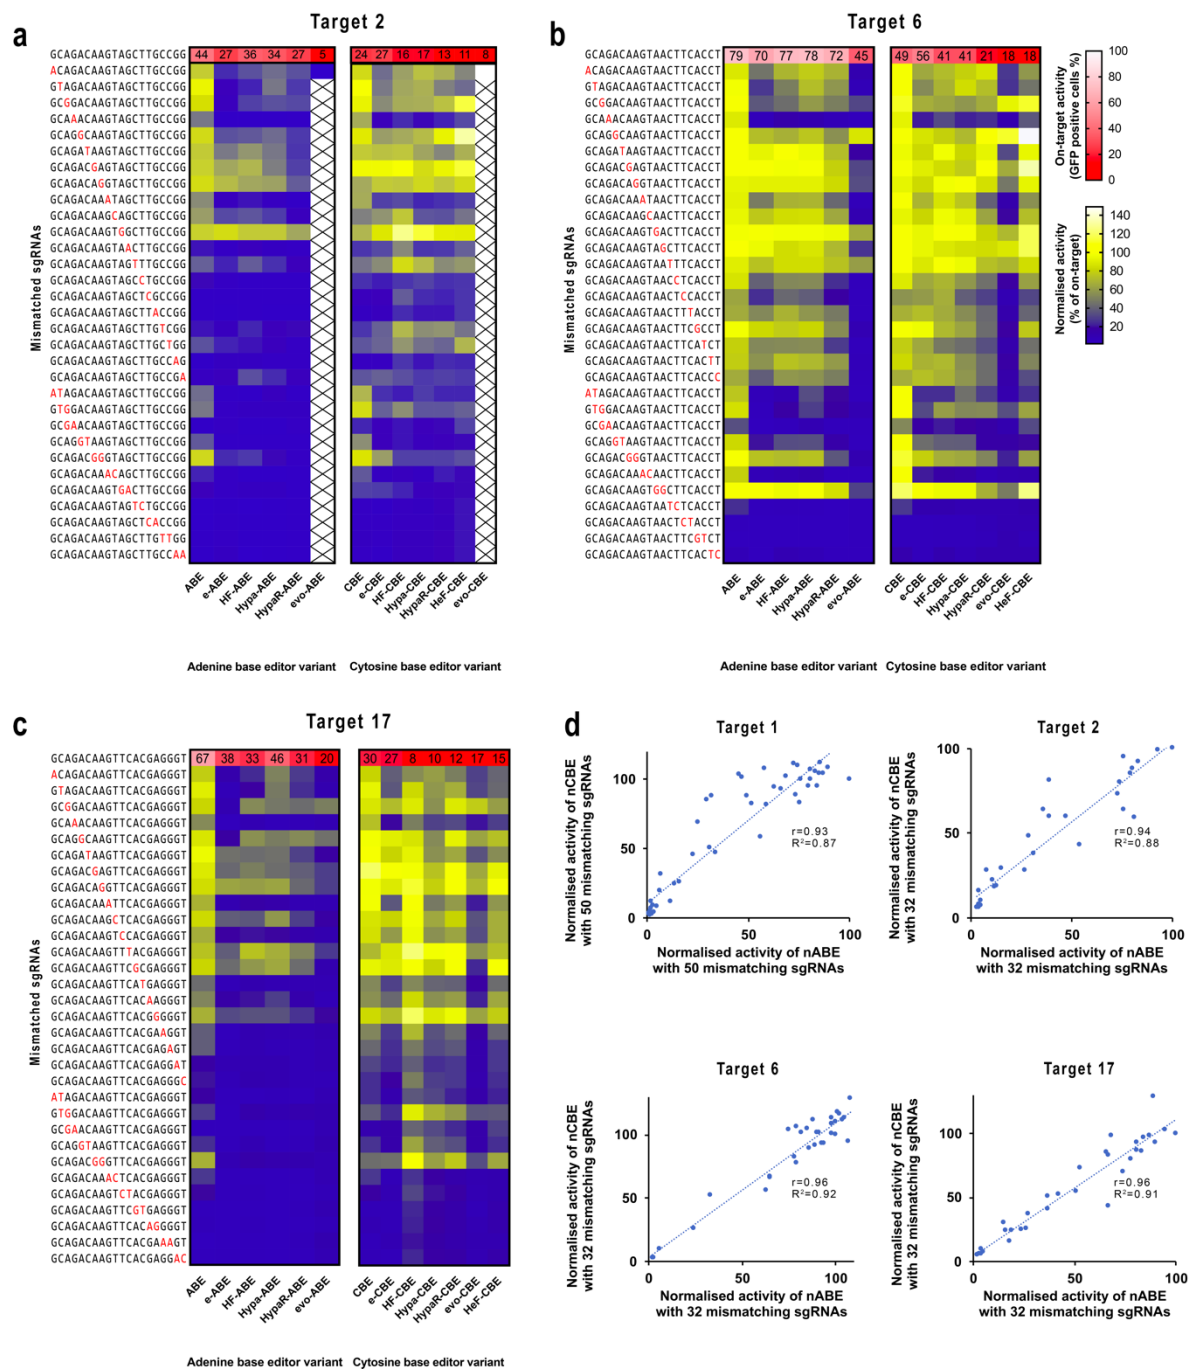

**Supplementary Figure 7 – Off-target activities of different ABE variants on three additional targets with 1 matched and 31 mismatched sgRNAs**

Mismatch tolerance of ABE and CBE and their high-fidelity variants were compared utilizing the same matching and 31 mismatching sgRNAs, the latter mismatching in either one or two positions, on targets 2 **(a)**, 6 **(b)** and 17 **(c)**. Blue-yellow heatmaps show the normalized activity (off-target/on-target) derived from three parallel transfections. White-red heatmaps show the on-target activity (mean rates of GFP positive cells) derived from three parallel transfections. For source data see Supplementary Data.

**(d)** Scatter plots of editing activities of nABE and nCBE on targets 1, 2, 6 and 17 on 50 and 32 mismatching sgRNAs that are shown on Figure 6 and on **a**, **b** and **c** (Pearson's  $r= 0.93, 0.94, 0.96$  and  $0.96$ , respectively).

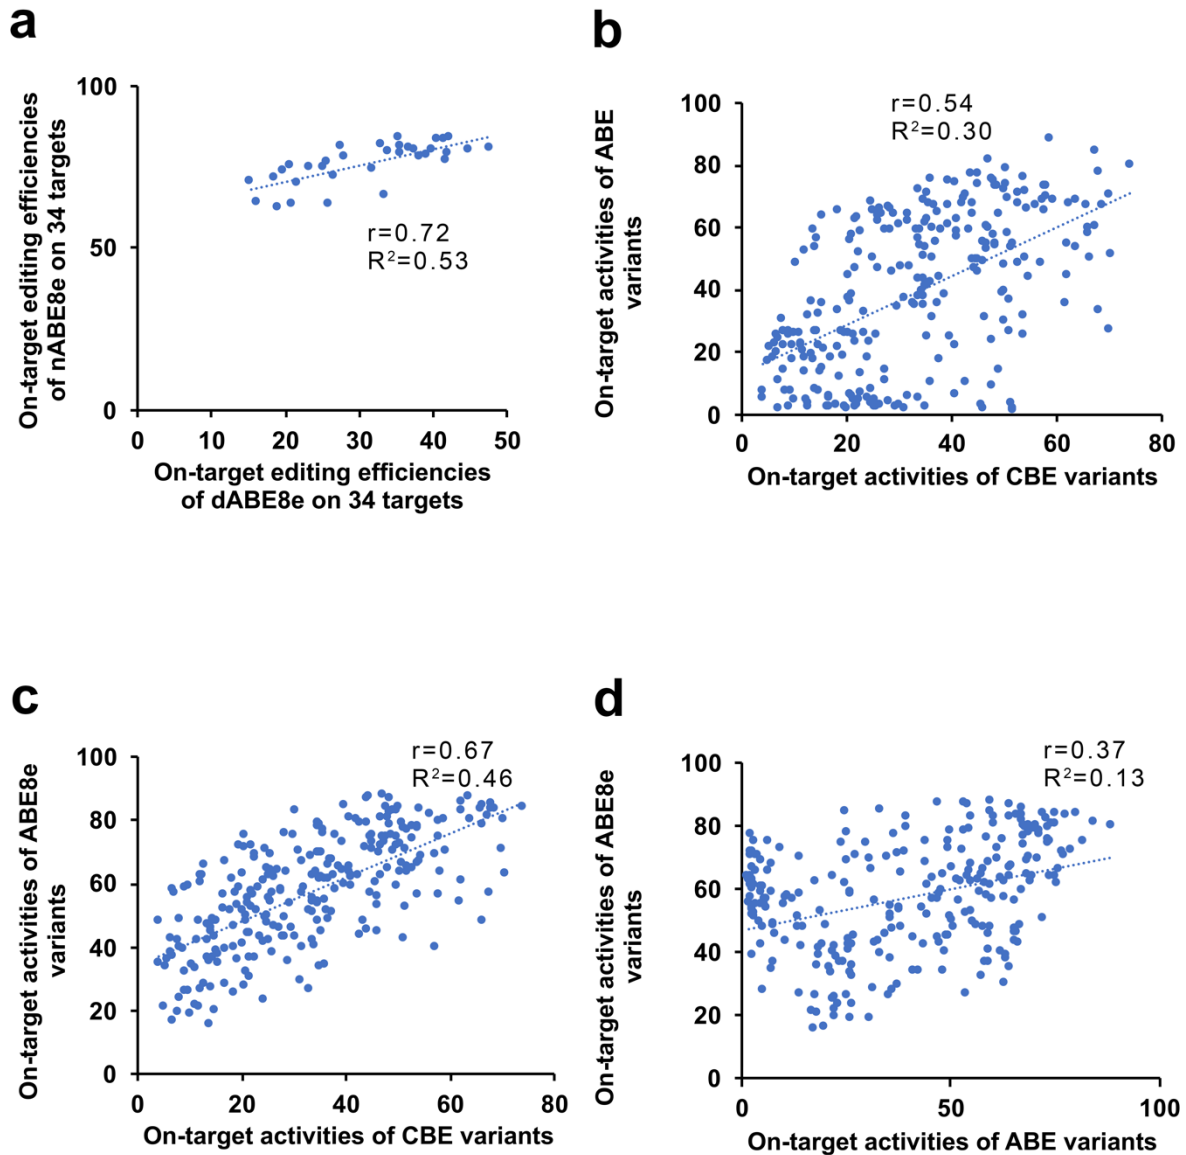

**Supplementary Figure 8 – The activities of ABE8e variants are more similar to CBE than to ABE**

(a) Scatter plot of the on-target editing efficiencies of on 34 target sites of nABE8e and dABE8e.

Scatter plot of the on-target editing efficiencies when either all (b) ABE and CBE variants (from Fig. 5); or (c) ABE8e and CBE variants (see Fig. 5 and Fig. 7); or (d) ABE8e and ABE variants (see Fig. 5 and Fig. 7) are compared on 34 target sites.



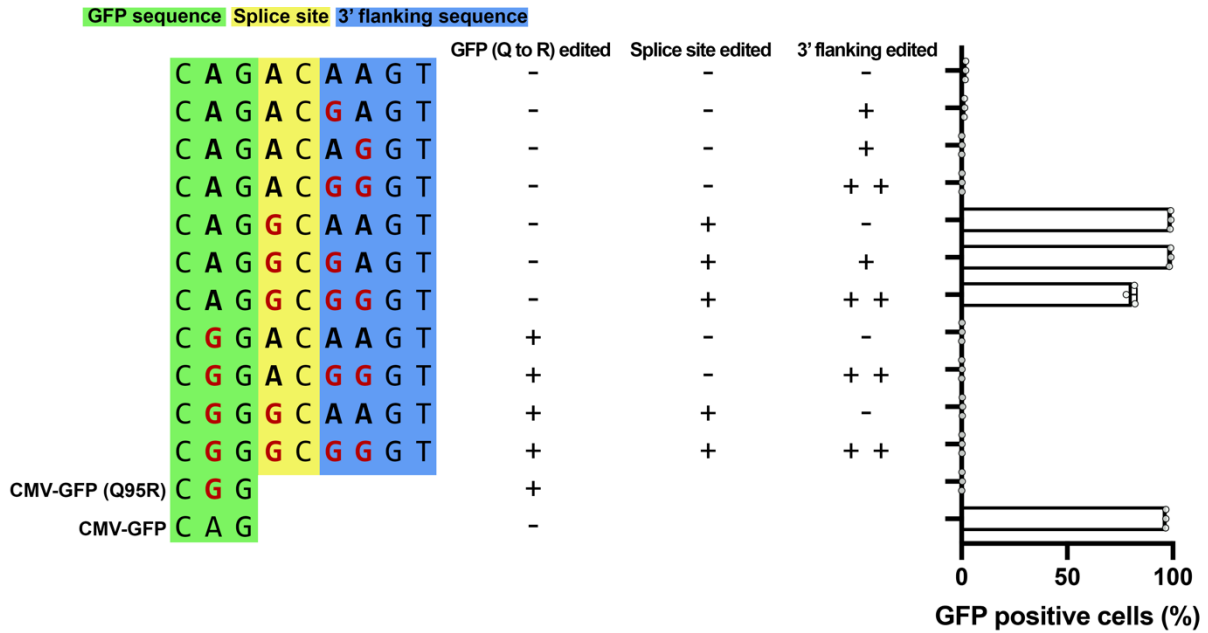

### Supplementary Figure 9 – Bystander editing of ABE8e

Various splice donor sites (yellow) and their sequence context in the BEAR GFP plasmid representing potential bystander-edited sequences are shown on the left panel; the last amino acid of GFP exon1 is displayed in green and the 3' flanking sequence of the splice site in blue. On the right panel the percentages of GFP positive cells (measured by flow cytometry) are shown when transfected with various BEAR-GFP constructs (without base editors), where the adenines in the targets of the BEAR sequence are changed to guanines by molecular cloning. These modifications represent the bases which are modified by ABE8e. As controls, the last two constructs do not contain an intron, they express either a wild type GFP or a GFP with a modified amino acid (Q95R). Columns represent means +/- SD of three parallel transfections (grey circles).

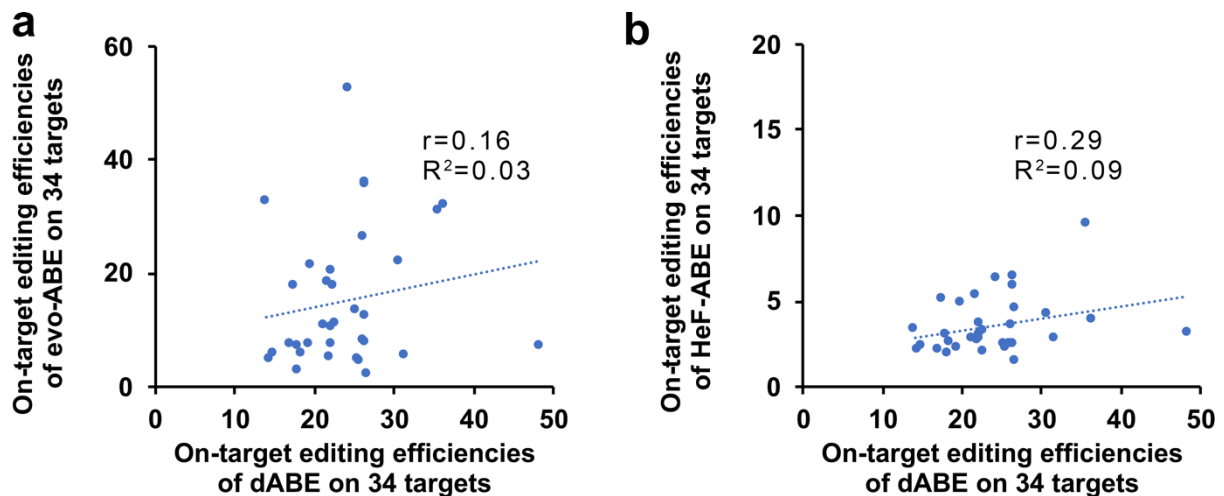

Supplementary Figure 10 – The on-target activity of dABE barely correlates with evo- or HeF-ABE

Scatter plot of the on-target editing efficiency of dABE, versus either (a) evo-ABE and (b) HeF-ABE on 34 target sites.

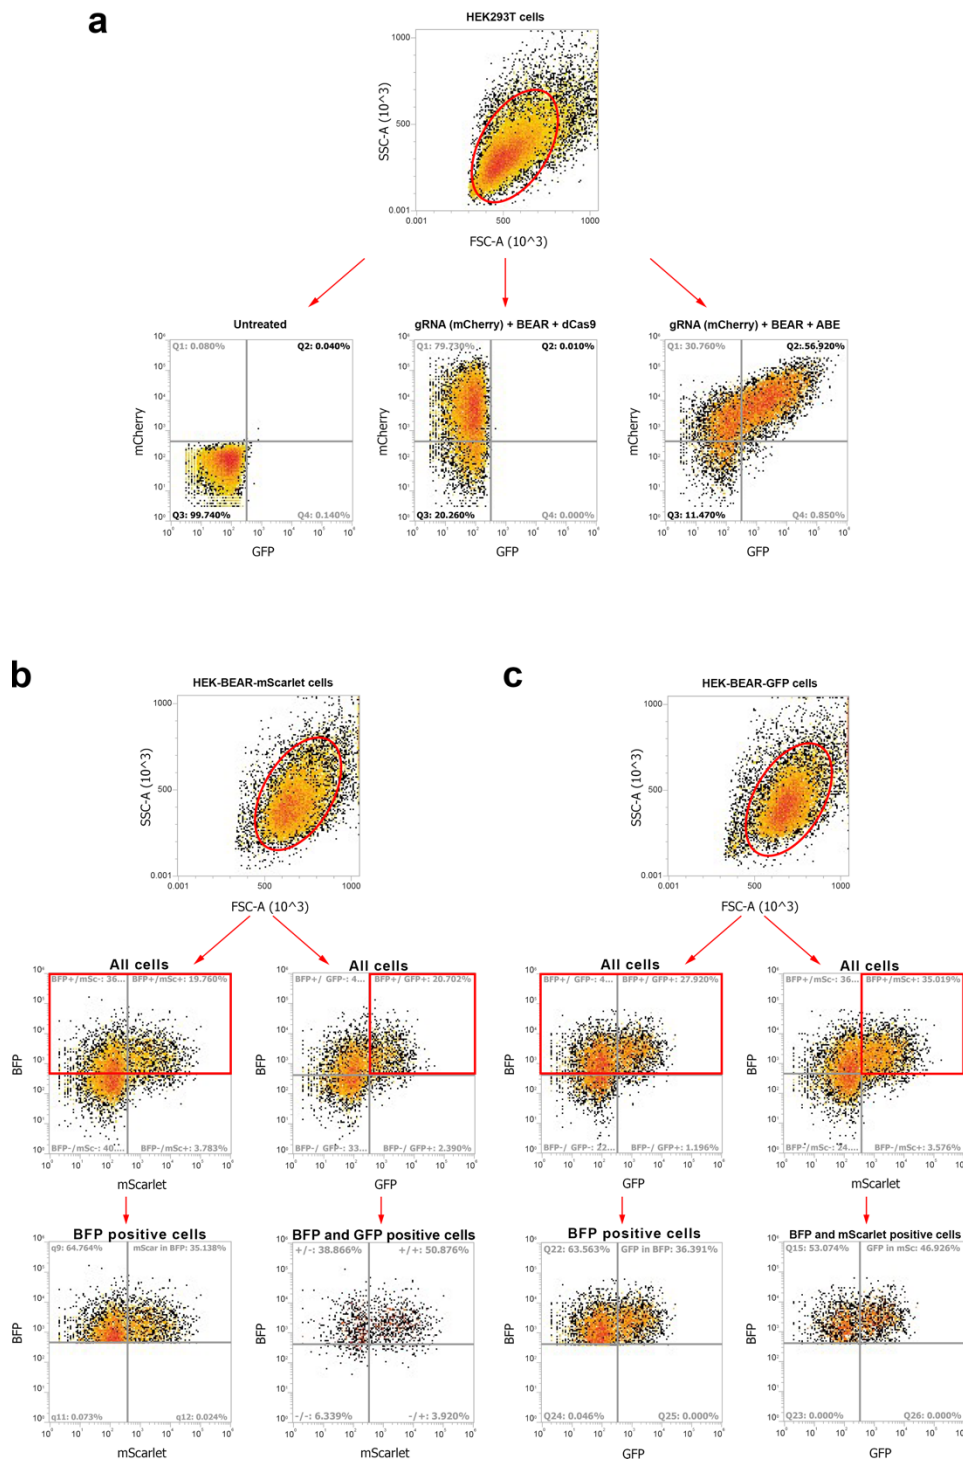

### Supplementary Figure 11 – Flow cytometry gating examples

Flow cytometry gating examples are shown for different BEAR experiments. On panel (a) a density plot of HEK293T cells is shown when all live single cells (determined by FSC and SSC parameters) are either (1) untransfected (left plot) and thus show no fluorescence for mCherry or GFP, (2) co-transfected with an sgRNA-mCherry plasmid and the BEAR-GFP plasmid but with a dCas9, thus displaying mCherry but no GFP fluorescence, (3) or sgRNA-mCherry and BEAR-GFP plasmid is co-transfected with an ABE expressing plasmid, causing the splice site to be edited, and thus displaying both mCherry and GFP fluorescence. On panel (b) a gating example is shown from Fig. 4a where cells harbouring genomically integrated copies of BEAR-mScarlet sequences are co-edited alongside the

BEAR-GFP plasmid. On the upper left panel mScarlet positive cells are counted in all cells regardless of the presence of another fluorescent protein. The lower left panel shows mScarlet positive cells gated in the BFP positive population which accounts for the transfection marker enriched cells. On the upper right panel GFP and BFP positive cells are gated, and in this population mScarlet positive cells are counted (BEAR-GFP enrichment). On panel (c) a gating example is shown from **Fig. 4a** where cells harbouring genomically integrated copies of BEAR-GFP sequences are co-edited alongside the BEAR-mScarlet plasmid. On the upper left panel GFP positive cells are counted in all cells regardless of the presence of another fluorescent protein. The lower left panel shows GFP positive cells gated in the BFP positive population which accounts for the transfection marker enriched cells. On the upper right panel mScarlet and BFP positive cells are gated, and in this population GFP positive cells are counted (BEAR-mScarlet enrichment).

## Supplementary Methods – Detailed plasmid construction

The sequences of oligos used to construct all plasmids are listed in Supplementary Table 1.

To construct BEAR-GFP plasmid candidates, a target cloning plasmid (pAT9624-BEAR-cloning) was cloned first, in which the target sequence is freely variable and can be cloned between the Esp3I sites via one-pot cloning (see below). The GFP halves were amplified via PCR from pEGFP-C1 (Clontech) using primers *pAT9624-i1-for* and *pAT9624-i1-rev* and *pAT9624-i3-for* and *pAT9624-i3-rev*. The *Vim* intron sequence was amplified from the N2a genomic DNA with primers *pAT9624-i2-for* and *pAT9624-i2-rev*. The three inserts were cloned into an EcoRI and BshTI digested EGFP-C1 plasmid via Hi-Fi DNA Assembly.

For splice site screens and for on-target experiments all BEAR targets were cloned to pAT9624-BEAR-cloning between the Esp3I sites via one-pot cloning. Briefly, 2 units of Esp3I enzyme, 1.5 units of DNA ligase, 1 mM DTT, 500  $\mu$ M ATP, 50 ng vector and 5-5  $\mu$ M of target-coding oligonucleotides were mixed in Tango buffer, and the mixture was incubated at 37 °C for 30 minutes before being transformed into NEB5-alpha competent cells.

To clone sgRNA targets used with BEAR-GFP, an sgRNA cloning plasmid pAT9658-sgRNA-mCherry was constructed from an EF1-mCherry coding plasmid and a pU6-pegRNA-GG-acceptor (Addgene #132777) via Hi-Fi DNA Assembly. This plasmid expresses an mCherry protein in mammalian cells, which is applicable to monitor transfection efficiency, and an mRFP sequence in bacteria between the target cloning sites, which induces bacterial colonies to turn white instead of red upon successful cloning. The cloning site is BpiI, so all other enzyme recognition sites were mutated by introducing silent mutations into the mRFP1 plasmid. All sgRNA targets were cloned into this plasmid, to the BpiI sites, via one-pot cloning using the above described protocol with minute modifications (i.e. Green buffer and no DTT was used).

To clone the sgRNA targets used with BEAR-mScarlet and -mCherry, an sgRNA cloning plasmid pAT9679-BFP-sgRNA was constructed. mCherry in plasmid pAT9658-sgRNA-mCherry was replaced with BFP between BamHI and BglII sites via amplifying BFP by PCR, using primers *pAT9679-for* and *-rev*, and assembling the fragments via Hi-Fi DNA Assembly. This plasmid expresses a BFP protein in mammalian cells, which is applicable to monitor transfection efficiency, and can be used along with mScarlet and mCherry coding BEAR plasmids.

To construct the ABE coding pAT9676-ABE plasmid, the ABE coding sequence was amplified from pLenti-ABERA-P2A-Puro (Addgene #112675) using primers *pAT9676-ABE-for* and *-rev*, and it was cloned to the ZraI and PscI sites of a pUC19 plasmid via Hi-Fi DNA Assembly. A BGH polyA sequence was amplified via PCR with primers *pAT9676-BGH-for* and *-rev*, and it was cloned to the PscI site of the previous construct via Hi-Fi DNA Assembly.

To construct the dABE coding pAT9749-dABE plasmid from pAT9676-ABE, site-directed mutagenesis was applied to mutate the H840A amino acid, in order to gain a nuclease inactive ABE. pAT9676-ABE was digested with PscI and Eco32I. The respective discarded section of Cas9 was

amplified from the same plasmid, in two fragments, using primers *pAT9749-F1-for* and *-rev* and *pAT9749-F2-for* and *-rev*, in which the overlapping parts coded the mutant amino acid. The vector and the two fragments were assembled via Hi-Fi DNA Assembly.

To construct the CBE coding pAT9675-CBE plasmid, the CBE coding sequence was amplified from pLenti-FNLS-P2A-Puro (Addgene #110841) with primers *pAT9675-CBE-for* and *-rev*, and it was cloned to the *ZraI* and *PscI* sites of a pUC19 plasmid via Hi-Fi DNA Assembly. A BGH polyA sequence was amplified by PCR, using primers *pAT9675-BGH-for* and *pAT9676-BGH-rev*, and it was cloned to the *PscI* site of the previous construct via Hi-Fi DNA Assembly.

To construct the dCBE coding pAT9748-dCBE plasmid from pAT9675-CBE, site directed mutagenesis was applied to mutate the H840A amino acid, in order to gain a nuclease inactive CBE. pAT9675-CBE was digested with *PscI* and *Eco32I*. The respective discarded section of Cas9 was amplified from the same plasmid, in two fragments, with primers *pAT9749-F1-for* and *-rev* and *pAT9749-F2-for* and *-rev*, in which the overlapping parts coded the mutant amino acid. The vector and the two fragments were assembled via Hi-Fi DNA Assembly.

The Cas9 coding plasmid used was pX330-Flag-wtSpCas9 (Addgene #92353). The dCas9 coding plasmid used was pX330-Flag-dSpCas9 (Addgene #92113). The nCas9 coding plasmid used was pX330-Flag-wtSpCas9-D10A (Addgene #80448).

To construct the pAT9750-BEAR-mCherry plasmid with inactive splice donor site, the two mCherry halves were amplified from a pcDNA3.1-mCherry (Addgene #128744) plasmid via PCR using primers *pAT9750-il-for* and *-rev* and *pAT9750-i3-for* and *-rev*. The *Vim* intron sequence was amplified from pAT9651-BEAR-GFP with primers *pAT9750-i2-for* and *pAT9750-i2-rev*. The three inserts were cloned into an *EcoRI* and *BshTI* digested EGFP-C1 plasmid via Hi-Fi DNA Assembly.

To construct the pAT9751-BEAR-mCherry-active plasmid with pre-edited splice donor site, the two mCherry halves were amplified from a pcDNA3.1-mCherry (Addgene #128744) plasmid via PCR using primers *pAT9751-il-for* and *pAT9750-il-rev* and *pAT9750-i3-for* and *-rev*. The *Vim* intron sequence was amplified from pAT9651-BEAR-GFP with primers *pAT9750-i2-for* and *pAT9750-i2-rev*. The three inserts were cloned into an *EcoRI* and *BshTI* digested EGFP-C1 plasmid via Hi-Fi DNA Assembly.

To construct the BEAR-mScarlet plasmids, mScarlet CDS from pCytERM\_mScarlet\_N1 (Addgene #85066) was cloned into pEGFP-C1 (pmScarlet-C1). To construct pAT9752-BEAR-mScarlet with inactive splice donor site, the two pmScarlet halves were amplified from the mScarlet-C1 plasmid via PCR using primers *pAT9624-il-for* and *pAT9752-il-rev* and *pAT9752-i3-for* and *pAT9624-i3-rev*. The *Vim* intron sequence was amplified from pAT9651-BEAR-GFP with primers *pAT9750-i2-for* and *pAT9752-i2-rev*. The three inserts were cloned into an *EcoRI* and *BshTI* digested EGFP-C1 plasmid via Hi-Fi DNA Assembly.

To construct pAT9753-BEAR-mScarlet with pre-edited splice donor site, the two mScarlet halves were amplified from the mScarlet-C1 plasmid via PCR using primers *pAT9624-il-for* and *pAT9753-il-rev* and *pAT9752-i3-for* and *pAT9624-i3-rev*. The *Vim* intron sequence was amplified from pAT9651-

BEAR-GFP with primers *pAT9750-i2-for* and *pAT9752-i2-rev*. The three inserts were cloned into an EcoRI and BshTI digested EGFP-C1 plasmid via Hi-Fi DNA Assembly.

To construct high fidelity ABE and CBE variants (pAT9991-eABE, pAT9992-HF-ABE, pAT9993-Hypa-ABE, pAT9994-HypaR661A-ABE, pAT9995-evoABE, pAT9996-HeF-ABE, pAT15064-eCBE, pAT15065-HF-CBE, pAT15066-Hypa-CBE, pAT15067-HypaR661A-CBE, pAT15068-evoCBE, pAT15069-HeF-CBE) increased fidelity Cas9 coding sequences (pX330-Flag-eSpCas9, -SpCas9-HF1, -HypaSpCas9, -Hypa-A-SpCas9, -evoSpCas9, -HeFSpCas9 – Addgene #126754-126459) were amplified by PCR using primers *pAT9991-for* and *pAT9749-F2-rev*. To construct the ABE variants, the amplified increased fidelity Cas9 fragments were cloned to a PScI and BglIII digested pAT9676-ABE plasmid via Hi-Fi DNA Assembly. To construct the CBE variants, the amplified increased fidelity Cas9 fragments were cloned to a PScI and BglIII digested pAT9675-CBE plasmid via Hi-Fi DNA Assembly. To append the UGI sequence to the CBE variants, high fidelity variant constructs and pAT9675-CBE were digested with NotI and Mva1269I, respectively and the UGI containing fragment was ligated with a T4 ligase.

To construct the editing window screen target plasmids with pre-edited or inactive splice donor site, GFP halves were amplified from the EGFP-C1 plasmid with primers listed in the primer list below (insert 1 and insert 3), and the intron sequence (insert 2) was amplified from the pAT9651-BEAR-GFP plasmid with primers listed in the primer list below. The three inserts were cloned into an EcoRI and BshTI digested EGFP-C1 plasmid via Hi-Fi DNA Assembly. All sgRNA targets were cloned to the plasmid pAT9658-sgRNA-mCherry plasmid using the protocol described above.

To construct BEAR-GFP and BEAR-mScarlet plasmids with different intron positions, GFP and mScarlet halves were amplified from pEGFP-C1 and mScarlet-C1 plasmids via PCR, using “insert 1 and insert 3” primers, as indicated in Supplementary Table 1 under the title “BEAR plasmids with different intron positions”. The *Vim* intron sequence was amplified from the pAT9651-BEAR-GFP plasmid via PCR, using “insert 2” primers.

To construct BEAR-GFP and BEAR-mScarlet expressing cell lines, the pSc1-puro (Addgene #80438) plasmid was modified to eliminate the sgRNA coding sequence, but not its target site. The GFP sequence was replaced by the coding sequences of BEAR-GFP and BEAR-mScarlet, which were cloned to the BshTI and EcoRI sites of this plasmid. The spacer that targets and linearizes these plasmids within the cells was cloned to pmCherry-gRNA (Addgene #80457) using the above described one-pot cloning method, utilizing oligos *U6-TL oligo-1* and *-2*. AAVS1 targeting spacers (AAVS1-a and -b) were cloned to pmCherry-gRNA (Addgene #80457) using the above described one-pot cloning method, utilizing oligos *AAVS1-a* and *-b*, *oligo-1* and *-2*. U6-AAVS1-a was used to construct BEAR-GFP, and U6-AAVS1-b was used to create BEAR-mScarlet cell lines.

To construct pAT15516\_BEAR-GFP-2in1 the coding sequence of BEAR-GFP was amplified by PCR from pAT9651 using primers *BEAR-GFP-2in1-for* and *-rev* and the product was cloned into a MunI and NotI digested pAT15415 plasmid via HiFi Assembly.

For the enrichment experiments genomic targets were cloned to pAT9679-BFP-sgRNA using the above described one-pot cloning method, utilizing oligos listed in Table 2 (section - *oligonucleotides used for cloning genomic sgRNA targets*).

For the on-target experiments, sgRNA spacers (T1-T34) were cloned into the plasmid pAT9658-sgRNA-mCherry plasmid.

For the off-target experiments, mismatching sgRNA spacers (targets: T1, T2, T6, T7 and T17) were cloned into the plasmid pAT9658-sgRNA-mCherry plasmid.

To construct ABE8e variants ABE8e sequence was amplified from plasmid ABE8e (Addgene #138489) using primers (*ABE8e-for* and *ABE8e-rev*) and the product was cloned into NcoI and Eco8II digested ABE coding plasmids (pAT9676, pAT9749, pAT9991, pAT9992, pAT9993, pAT9994, pAT9995, pAT9996) via HiFi Assembly.



| Method            | Base editor used |      |      |      | Is the reporter transient? | Background signal | Number of targets tested | Number of possible targets | Can CBE and ABE be compared on the same target sequences? | Is enrichment with transient reporter demonstrated? | Can indels generate signal?                    |
|-------------------|------------------|------|------|------|----------------------------|-------------------|--------------------------|----------------------------|-----------------------------------------------------------|-----------------------------------------------------|------------------------------------------------|
|                   | nCBE             | nABE | dCBE | dABE |                            |                   |                          |                            |                                                           |                                                     |                                                |
| BE-FLARE          | yes              | no   | no   | no   | yes                        | <0.5 %            | 1                        | 1                          | no                                                        | yes (FACS)                                          | ND                                             |
| ACE               | yes              | no   | no   | no   | yes                        | 0-6%              | 1                        | 1                          | no                                                        | no*                                                 | 8% background signal with nCas9, 70% with Cas9 |
| GFP panel         | yes              | no   | no   | no   | yes                        | <0.5 %            | 3                        | restricted                 | no                                                        | no                                                  | ND                                             |
| TREE              | yes              | no   | no   | no   | yes                        | <0.5 %            | 1                        | 1                          | no                                                        | yes (FACS)                                          | ND                                             |
| GO                | yes              | yes  | no   | no   | ND                         | <0.5 %            | 10                       | restricted                 | no                                                        | no*                                                 | Not sensitive                                  |
| BEON              | no               | yes  | no   | no   | yes                        | 5-20%             | 14                       | minimally restricted       | no                                                        | yes (FACS)                                          | ND                                             |
| BEAR (this study) | yes              | yes  | yes  | yes  | yes                        | <0.5 %            | 79                       | minimally restricted       | yes                                                       | yes (FACS)                                          | Not sensitive                                  |

### Supplementary Table 1 – Comparison of seven fluorescence-based markers of base editing

Seven fluorescent markers of base editing are compared (including this work). In the first column we compared whether the assay was demonstrated on detecting CBE or ABE using a nickase (nCBE, nABE) or nuclease inactive (dCBE, dABE) Cas9 partner. In the next column we compare if the method was used with a transient (plasmid) reporter. Next, we evaluate the amount of background fluorescent signal that is produced by the markers in a negative control condition (fluorescent marker alone without base editors). Next, the actual number of tested and the theoretically possible target sites are counted. Next, we compare whether the assay has the possibility of testing CBE and ABE on the exact same spacer sequences. After that, we indicate whether any base editing enrichment was demonstrated and if so, then whether it was with a transient or with a genomically integrated reporter. In the last column we reveal if any experiments were shown to detect the amount of generated fluorescent signal when the reporter is targeted by a nickase or a nuclease Cas9. “ND” abbreviation in the table means that that specific feature was not demonstrated in the publication. “\*” abbreviation in the table means that enrichment was demonstrated in the publication but only on a genomically integrated reporter, not on a transient one.

## Supplementary Table 2 – List of oligonucleotides

| Oligonucleotides used for BEAR-GFP target cloning plasmid pAT9624                                  |                                                   |                                 |
|----------------------------------------------------------------------------------------------------|---------------------------------------------------|---------------------------------|
| oligo name                                                                                         | oligo sequence                                    |                                 |
| pAT9624-i1-for                                                                                     | GTGAACCGTCAGATCCGCTAG                             |                                 |
| pAT9624-i1-rev                                                                                     | TGAGACGTAAGATCTCCTCGTCTCGCACGTAGCCTTCGGGCATG      |                                 |
| pAT9624-i2-for                                                                                     | GAGACGAGGAGATCTTACGTCTCAATTTTTTAGTTAAAATATGGGAAAG |                                 |
| pAT9624-i2-rev                                                                                     | CGTCCTTGAAGAAGATGGTGCCTCCTGCTCAAAAAAGAAAC         |                                 |
| pAT9624-i3-for                                                                                     | GAGCGCACCATCTTCTTCAAGGACG                         |                                 |
| pAT9624-i3-rev                                                                                     | CCC GCGGTACCGTCGAC                                |                                 |
|                                                                                                    |                                                   |                                 |
|                                                                                                    |                                                   |                                 |
| Oligonucleotides used for cloning splice site screen target plasmids (Fig. 2, Supplementary Fig.2) |                                                   |                                 |
| plasmid name                                                                                       | oligo1                                            | oligo2                          |
| P1 - active                                                                                        | CGTGCAGGCAAGTGCATAGACTGCGGGTTG                    | AAATCAACCCCGCAGTCTATGCACTTGCCTG |
| P1 - inactive                                                                                      | CGTGCAGACAAGTGCATAGACTGCGGGTTG                    | AAATCAACCCCGCAGTCTATGCACTTGTCTG |
| P2 - active                                                                                        | CGTGCAAGTAAGTGCATAGACTGCGGGTTG                    | AAATCAACCCCGCAGTCTATGCACTTACTTG |
| P2 - inactive                                                                                      | CGTGCAAATAAGTGCATAGACTGCGGGTTG                    | AAATCAACCCCGCAGTCTATGCACTTATTTG |
| P3 - active                                                                                        | CGTGCAGGTTGAGGCATAGACTGCGGGTTG                    | AAATCAACCCCGCAGTCTATGCCTCAACCTG |
| P3 - inactive                                                                                      | CGTGCAGATTGAGGCATAGACTGCGGGTTG                    | AAATCAACCCCGCAGTCTATGCCTCAATCTG |
| P4 - active                                                                                        | CGTGCAGTTAAGTGCTGGAGGTGGGGGTTG                    | AAATCAACCCCCACCTCCAGCACTTAACTG  |
| P4 - inactive                                                                                      | CGTGCAGTCAAGTGCTGGAGGTGGGGGTTG                    | AAATCAACCCCCACCTCCAGCACTTGACTG  |
| P5 - active                                                                                        | CGTGCAGGTTGCGGCTGGAGGTGGGGGTTG                    | AAATCAACCCCCACCTCCAGCCGCAACCTG  |
| P5 - inactive                                                                                      | CGTGCAGGCTGCGGCTGGAGGTGGGGGTTG                    | AAATCAACCCCCACCTCCAGCCGAGCCTG   |
|                                                                                                    |                                                   |                                 |
|                                                                                                    |                                                   |                                 |
| Oligonucleotides used for cloning sgRNA targets on Fig. 2c, d                                      |                                                   |                                 |
| plasmid name                                                                                       | oligo1                                            | oligo2                          |
| P1-sgRNA                                                                                           | CACCGCAGACAAGTGCATAGACTG                          | AAACCAGTCTATGCACTTGTCTGC        |
| P2-sgRNA                                                                                           | CACCGCAAATAAGTGCATAGACTG                          | AAACCAGTCTATGCACTTATTTGC        |
| P3-sgRNA                                                                                           | CACCGCAGATTGAGGCATAGACTG                          | AAACCAGTCTATGCCTCAATCTGC        |
| P4-sgRNA                                                                                           | CACCGCAGTCAAGTGCTGGAGGTG                          | AAACCACCTCCAGCACTTGACTGC        |
| P5-sgRNA                                                                                           | CACCGCAGGCTGCGGCTGGAGGTG                          | AAACCACCTCCAGCCGAGCCTGC         |

| <b>Oligonucleotides used for cloning ABE, ABE8e, CBE and their increased fidelity variants, Fig. 2-6</b> |                                                        |
|----------------------------------------------------------------------------------------------------------|--------------------------------------------------------|
| <b>oligo name</b>                                                                                        | <b>oligo sequence</b>                                  |
| pAT9676-ABE-for                                                                                          | ATTTCCCGAAAAAGTGCCACCTGACGTCCAGCAGAGATCCACTTTGG        |
| pAT9676-ABE-rev                                                                                          | TGGCCTTTTGCTGGCCTTTTGCTCACATGTCATTTCTTTTCTTAGCTTGACCAG |
| pAT9676-BGH-for                                                                                          | GCTAAGAAAAAGAAATGACATGTCCTAGAGCTCGCTGATCAGCCTCG        |
| pAT9676-BGH-rev                                                                                          | TTTTGCTGGCCTTTTGCTCAGCGGCCGCTCCCCAG                    |
| pAT9749-F1-for                                                                                           | GAGGAAAACGAGGACATTCTGGAAGAT                            |
| pAT9749-F1-rev                                                                                           | GAAAGCTCTGAGGCACGATGGCGTCCACATCGTAGTCGG                |
| pAT9749-F2-for                                                                                           | CCGACTACGATGTGGACGCCATCGTGCCTCAGAGCTTTC                |
| pAT9749-F2-rev                                                                                           | GGCTGATCAGCGAGCTCTAGG                                  |
| pAT9675-CBE-for                                                                                          | ATTTCCCGAAAAAGTGCCACCTGACGTCCAGCAGAGATCCACTTTGG        |
| pAT9675-CBE-rev                                                                                          | TGGCCTTTTGCTGGCCTTTTGCTCACATGTCAGACTTTCCTTCTTCTTGG     |
| pAT9675-BGH-for                                                                                          | AGAAGAAGAGGAAAAGTCTGACATGTCCTAGAGCTCGCTGATCAGCCTCG     |
| pAT9991-for                                                                                              | GAACCGGATCTGCTATCTGCAAGA                               |
| ABE8e-for                                                                                                | cgtgacgcgggatccgccaccatgaacg                           |
| ABE8e-rev                                                                                                | gacccccagagctaccacctgaggattcagtggtgcgctctcg            |
| <b>Oligonucleotides used for cloning editing window BEAR target plasmids (Sup. Fig. 3a)</b>              |                                                        |
| <b>oligo name</b>                                                                                        | <b>insert1 - fwd oligo</b>                             |
| Window - inactive - A20-1-i1-for                                                                         | GTGAACCGTCAGATCCGCTAG                                  |
| Window - inactive - A20-19-i1-rev                                                                        | CCGAGTCTATGCCACACCCATCAGGGCACGGGCAG                    |
| Window - inactive - A20-1-i2-rev                                                                         | GGGTGGTCACGAGGGTGGGCCTGCTCAAAAAAGAAAC                  |
| Window - inactive - A20-1-i3-for                                                                         | GCCCACCTCGTGACCAC                                      |
| Window - inactive - A20-1-i3-rev                                                                         | CCCGCGGTACCGTCGAC                                      |
| Window - inactive - A20-19-i1-rev                                                                        | CCGAGTCTATGCCACACCCATCAGGGCACGGGCAG                    |
| Window - inactive - A20-19-i2-for                                                                        | GGGTGTGGCATAGACTGCGGG                                  |
| Window - inactive - A18-i2-for                                                                           | CAAGTGCCCGTGCCCTGATGGGTGGCATAGACTGCGGG                 |
| Window - inactive - A17-i2-for                                                                           | CAAGTGCCCGTGCCCTGATGGGTGGCATAGACTGCGGG                 |
| Window - inactive - A16-i2-for                                                                           | CAAGTGCCCGTGCCCTGATGGGTGCATAGACTGCGGG                  |
| Window - inactive - A15-i2-for                                                                           | CAAGTGCCCGTGCCCTGATGGGTGCATAGACTGCGGGTTG               |
| Window - inactive - A14-i2-for                                                                           | CAAGTGCCCGTGCCCTGATGGGTATAGACTGCGGGTTG                 |
| Window - inactive - A13-i2-for                                                                           | CAAGTGCCCGTGCCCTGATGGGTAGACTGCGGGTTG                   |
| Window - inactive - A12-i2-for                                                                           | CAAGTGCCCGTGCCCTGATGGGTAGACTGCGGGTTG                   |

|                                                                                      |                                                   |                          |
|--------------------------------------------------------------------------------------|---------------------------------------------------|--------------------------|
| Window - inactive - A11-i2-for                                                       | CAAGCTGCCCGTGCCCTGATGGGTGACTGCGGGTTGA             |                          |
| Window - inactive - A10-i2-for                                                       | CAAGCTGCCCGTGCCCTGATGGGTACTGCGGGTTGATTTTTTAG      |                          |
| Window - inactive - A9-i2-for                                                        | CAAGCTGCCCGTGCCCTGATGGGTCTGCGGGTTGATTTTTTAG       |                          |
| Window - inactive - A8-i2-for                                                        | CAAGCTGCCCGTGCCCTGATGGGTGCGGGTTGATTTTTTAG         |                          |
| Window - inactive - A7-i2-for                                                        | CAAGCTGCCCGTGCCCTGATGGGTGCGGGTTGATTTTTTAG         |                          |
| Window - inactive - A6-i2-for                                                        | CAAGCTGCCCGTGCCCTGATGGGTGGGTTGATTTTTTAGTTAAAATATG |                          |
| Window - inactive - A5-1-i2-for                                                      | CAAGCTGCCCGTGCCCTGATGGGGGGTTGATTTTTTAGTTAAAATATG  |                          |
|                                                                                      |                                                   |                          |
| Window - active 20-1-i1-for                                                          | GTGAACCGTCAGATCCGCTAG                             |                          |
| Window - active 20-1-i2-rev                                                          | GGGTGGTCACGAGGGTGGGCCTGCTCAAAAAAGAAAC             |                          |
| Window - active 20-1-i3-for                                                          | GCCCACCCTCGTGACCAC                                |                          |
| Window - active 20-1-i3-rev                                                          | CCCGCGGTACCGTCGAC                                 |                          |
| Window - active 20-19-i1-rev                                                         | CCGAGTCTATGCCACACCCACCAGGGCACGGGCAG               |                          |
| Window - active 18-1-i1-rev                                                          | ACCAGGGCACGGGCAG                                  |                          |
| Window - active 20-19-i2-rev                                                         | GGGTGTGGCATAGACTGCGGG                             |                          |
| Window - active 18-i2-rev                                                            | CAAGCTGCCCGTGCCCTGGTGGGTGGCATAGACTGCGGG           |                          |
| Window - active 17-i2-rev                                                            | CAAGCTGCCCGTGCCCTGGTGGGTGGCATAGACTGCGGG           |                          |
| Window - active 16-i2-rev                                                            | CAAGCTGCCCGTGCCCTGGTGGGTGCATAGACTGCGGG            |                          |
| Window - active 15-i2-rev                                                            | CAAGCTGCCCGTGCCCTGGTGGGTGCATAGACTGCGGGTTG         |                          |
| Window - active 14-i2-rev                                                            | CAAGCTGCCCGTGCCCTGGTGGGTATAGACTGCGGGTTG           |                          |
| Window - active 13-i2-rev                                                            | CAAGCTGCCCGTGCCCTGGTGGGTAGACTGCGGGTTG             |                          |
| Window - active 12-i2-rev                                                            | CAAGCTGCCCGTGCCCTGGTGGGTAGACTGCGGGTTG             |                          |
| Window - active 11-i2-rev                                                            | CAAGCTGCCCGTGCCCTGGTGGGTGACTGCGGGTTGA             |                          |
| Window - active 10-i2-rev                                                            | CAAGCTGCCCGTGCCCTGGTGGGTACTGCGGGTTGATTTTTTAG      |                          |
| Window - active 9-i2-rev                                                             | CAAGCTGCCCGTGCCCTGGTGGGTCTGCGGGTTGATTTTTTAG       |                          |
| Window - active 8-i2-rev                                                             | CAAGCTGCCCGTGCCCTGGTGGGTGCGGGTTGATTTTTTAG         |                          |
| Window - active 7-i2-rev                                                             | CAAGCTGCCCGTGCCCTGGTGGGTGCGGGTTGATTTTTTAG         |                          |
| Window - active 6-i2-rev                                                             | CAAGCTGCCCGTGCCCTGGTGGGTGGGTTGATTTTTTAGTTAAAATATG |                          |
| Window - active 5-1-i2-rev                                                           | CAAGCTGCCCGTGCCCTGGTGGGGGGTTGATTTTTTAGTTAAAATATG  |                          |
|                                                                                      |                                                   |                          |
|                                                                                      |                                                   |                          |
| <b>Oligonucleotides used for cloning editing window sgRNA targets (Sup. Fig. 3a)</b> |                                                   |                          |
|                                                                                      |                                                   |                          |
| <b>plasmid name</b>                                                                  | <b>oligo1</b>                                     | <b>oligo2</b>            |
| sgRNA - window - 20                                                                  | CACCATGGGTGTGGCATAGACTGC                          | AAACGCAGTCTATGCCACACCCAT |
| sgRNA - window - 19                                                                  | CACCGATGGGTGTGGCATAGACTG                          | AAACAGTCTATGCCACACCCATC  |
| sgRNA - window - 18                                                                  | CACCGTGATGGGTTGGCATAGACTG                         | AAACAGTCTATGCCAACCCATCAC |

|                                                                                            |                                              |                           |
|--------------------------------------------------------------------------------------------|----------------------------------------------|---------------------------|
| sgRNA - window - 17                                                                        | CACCGCTGATGGGTGGCATAGACTG                    | AAACCAGTCTATGCCACCCATCAGC |
| sgRNA - window - 16                                                                        | CACCGCCTGATGGGTGCATAGACTG                    | AAACCAGTCTATGCACCCATCAGGC |
| sgRNA - window - 15                                                                        | CACCGCCCTGATGGGTGCATAGACTG                   | AAACCAGTCTATGACCCATCAGGGC |
| sgRNA - window - 14                                                                        | CACCGCCCTGATGGGTATAGACTG                     | AAACCAGTCTATACCCATCAGGGC  |
| sgRNA - window - 13                                                                        | CACCGTGCCCTGATGGGTAGACTG                     | AAACCAGTCTAACCCATCAGGGCAC |
| sgRNA - window - 12                                                                        | CACCGGTGCCCTGATGGGTAGACTG                    | AAACCAGTCTACCCATCAGGGCACC |
| sgRNA - window - 11                                                                        | CACCGCGTGCCCTGATGGGTACTG                     | AAACCAGTCACCCATCAGGGCACGC |
| sgRNA - window - 10                                                                        | CACCGCCGTGCCCTGATGGGTACTG                    | AAACCAGTACCCATCAGGGCACGGC |
| sgRNA - window - 9                                                                         | CACCGCCCGTGCCCTGATGGGTCTG                    | AAACCAGACCCATCAGGGCACGGGC |
| sgRNA - window - 8                                                                         | CACCGCCCGTGCCCTGATGGGTGC                     | AAACGCACCCATCAGGGCACGGGC  |
| sgRNA - window - 7                                                                         | CACCGTGCCCGTGCCCTGATGGGTCTG                  | AAACGACCCATCAGGGCACGGGCAC |
| sgRNA - window - 6                                                                         | CACCGCTGCCCGTGCCCTGATGGGT                    | AAACACCCATCAGGGCACGGGCAGC |
| sgRNA - window - 5                                                                         | CACCGCTGCCCGTGCCCTGATGGG                     | AAACCCCATCAGGGCACGGGCAGC  |
| sgRNA - window - 4                                                                         | CACCAGCTGCCCGTGCCCTGATGG                     | AAACCCATCAGGGCACGGGCAGCT  |
| sgRNA - window - 3                                                                         | CACCAAGCTGCCCGTGCCCTGATG                     | AAACCATCAGGGCACGGGCAGCTT  |
| sgRNA - window - 2                                                                         | CACCGCAAGCTGCCCGTGCCCTGAT                    | AAACATCAGGGCACGGGCAGCTTGC |
| sgRNA - window - 1                                                                         | CACCGCAAGCTGCCCGTGCCCTGA                     | AAACTCAGGGCACGGGCAGCTTGC  |
|                                                                                            |                                              |                           |
| <b>Oligonucleotides used for cloning BEAR-mScarlet and BEAR-mCherry plasmids (Fig. 3b)</b> |                                              |                           |
|                                                                                            |                                              |                           |
| <b>oligo name</b>                                                                          | <b>oligo sequence</b>                        |                           |
| pAT9750-i1-for                                                                             | CGTCAGATCCGCTAGCGCTACCGGTCGCCACCATGGTGAGCAAG |                           |
| pAT9750-i1-rev                                                                             | ACCCGCAGTCTATGCACTTGTCTGCAGGGAGGAGTCC        |                           |
| pAT9750-i2-for                                                                             | CAAGTGCATAGACTGC                             |                           |
| pAT9750-i2-rev                                                                             | ACTCGCCGTCCTGCTCAAAAAAGAAAC                  |                           |
| pAT9750-i3-for                                                                             | TTTTGAGCAGGACGGCGAGTTC                       |                           |
| pAT9750-i3-rev                                                                             | CGCGGTACCGTTCGACTGCAGCCCTCTAGATGCATGCTCG     |                           |
| pAT9751-i1-rev                                                                             | ACCCGCAGTCTATGCACTTGCCTGCAGGGAGGAGTCC        |                           |
| pAT9752-i1-rev                                                                             | ACCCGCAGTCTATGCACTTGTCTGCGTACGGTCACGGCG      |                           |
| pAT9752-i2-rev                                                                             | AGGGAGGTGTCCTGCTCAAAAAAGAAAC                 |                           |
| pAT9752-i3-for                                                                             | TTTTGAGCAGGACACCTCCCTGGAGG                   |                           |
| pAT9753-i1-rev                                                                             | ACCCGCAGTCTATGCACTTGCCTGCGTACGGTCACGGCG      |                           |
|                                                                                            |                                              |                           |
| <b>Oligonucleotides used for cloning pAT9679-BFP-sgRNA (Fig. 3b)</b>                       |                                              |                           |
|                                                                                            |                                              |                           |

| <b>oligo name</b>                                                 | <b>oligo sequence</b>                         |
|-------------------------------------------------------------------|-----------------------------------------------|
| pAT9679-for                                                       | ACACAGGTGTCGTGACGCGGGATCCGCCACCATGAGCG        |
| pAT9679-rev                                                       | AGCGAGCTCTAGGACATGTAGATCTTAATTAAGCTTGTGCCCCAG |
|                                                                   |                                               |
| <b>BEAR plasmids with different intron positions (Fig. 3c, d)</b> |                                               |
|                                                                   |                                               |
| <b>oligo name</b>                                                 | <b>oligo sequence</b>                         |
| all intron constructs - i1-for                                    | GTGAACCGTCAGATCCGCTAG                         |
| all intron constructs - i3-rev                                    | CCCGCGGTACCGTCGAC                             |
| GFP 53-i1-rev                                                     | CTGTGGTGCAGATAAACTTCAGGGTCAGCTTGCC            |
| GFP 53-i2-for                                                     | GAAGTTTATCTGCACCACAGGCAAGTGCATAGACTGCG        |
| GFP 53-i2-rev                                                     | GGCAGCTTGCTGCTCAAAAAAGAAAC                    |
| GFP 53-i3-for                                                     | TTTTGAGCAGGCAAGCTGCCCCGTGCC                   |
| GFP 58-i1-rev                                                     | ATCAGGGCACGGGCAG                              |
| GFP 58-i2-for                                                     | CAAGCTGCCCGTGCCCTGATGGGTATAGACTGCGGGTTG       |
| GFP 58-i2-rev                                                     | GGGTGGTACGAGGGTGGGCCTGCTCAAAAAAGAAAC          |
| GFP 58-i3-for                                                     | GCCCAACCTCGTGACCAC                            |
| GFP 87-i1-rev                                                     | CTGACTTGAAGAAATCGTGCTGCTTCATG                 |
| GFP 87-i2-for                                                     | GCACGATTTCTTCAAGTCAGGCAAGTGCATAGACTGCG        |
| GFP 87-i2-rev                                                     | CCTTCGGGCATGGCTGCTCAAAAAAGAAAC                |
| GFP 87-i3-for                                                     | TGAGCAGCCATGCCGAAGGCTACG                      |
| GFP 117-i1-rev                                                    | CCGAGTCTATGCCACACCACCCTCAAACCTCACCTCGGCGCG    |
| GFP 117-i2-for                                                    | GGGTGTGGCATAGACTGCGGG                         |
| GFP 117-i2-rev                                                    | CGGTTACCAGGGTGTGCGCTGCTCAAAAAAGAAAC           |
| GFP 117-i3-for                                                    | GCGACACCCTGGTGAACCG                           |
| mScarlet 65-i1-rev                                                | CTGAGGGGAAAGGATGTCCCAGGAGAAGGG                |
| mScarlet 65-i2-for                                                | GGGACATCCTTTCCCCTCAGGCAAGTGCATAGACTGCG        |
| mScarlet 65-i2-rev                                                | CGTACATGAACTGCTCAAAAAAGAAAC                   |
| mScarlet 65-i3-for                                                | TTTTGAGCAGTTCATGTACGGCTCCAGGG                 |
| mScarlet 71-i1-rev                                                | CTGGAGCCGTACATAAACTGAGGGGACAGGATG             |
| mScarlet 71-i2-for                                                | CAGTTTATGTACGGCTCCAGGCAAGTGCATAGACTGCG        |
| mScarlet 71-i2-rev                                                | GGTGAAGGCCCTGCTCAAAAAAGAAAC                   |
| mScarlet 71-i3-for                                                | TTTTGAGCAGGGCCTTACCAAGCACC                    |
| mScarlet 78-i1-rev                                                | CTGGGTGCTTGGTAAAGGCCCTGGAGCCGTA               |
| mScarlet 78-i2-for                                                | GGCCTTTACCAAGCACCCAGGCAAGTGCATAGACTGCG        |
| mScarlet 78-i2-rev                                                | GGGATGTCGGCTGCTCAAAAAAGAAAC                   |

|                                                                                                          |                                       |                            |
|----------------------------------------------------------------------------------------------------------|---------------------------------------|----------------------------|
| mScarlet 78-i3-for                                                                                       | TTTTGAGCAGCCGACATCCCCGACTACTATAAGCAG  |                            |
| mScarlet 110-i1-rev                                                                                      | ACCCGCAGTCTATGCACTTGCCTGCAGGGAGGAGTCC |                            |
| mScarlet 110-i2-for                                                                                      | CAAGTGCATAGACTGC                      |                            |
| mScarlet 110-i2-rev                                                                                      | ACTCGCCGTCCTGCTCAAAAAAGAAAC           |                            |
| mScarlet 110-i3-for                                                                                      | TTTTGAGCAGGACGGCGAGTTC                |                            |
|                                                                                                          |                                       |                            |
| <b>Oligonucleotides used for plasmids used in creating BEAR cell lines (Supplementary Fig.3, Fig. 4)</b> |                                       |                            |
|                                                                                                          |                                       |                            |
| <b>plasmid name</b>                                                                                      | <b>oligo1</b>                         | <b>oligo2</b>              |
| <b>U6-TL</b>                                                                                             | CACCGGCGCAACGCGATCGCGTAA              | AAACTTACGCGATCGCGTTGCGCC   |
| <b>U6-AAVS-1-a</b>                                                                                       | CACCACAGTGGGGCCACTAGGGAC              | AAACGTCCCTAGTGGCCCCACTGT   |
| <b>U6-AAVS-1-b</b>                                                                                       | CACCGGTCCCTAGTGGCCCCACTG              | AAACCAGTGGGGCCACTAGGGACC   |
|                                                                                                          |                                       |                            |
| <b>Oligonucleotides used for cloning genomic sgRNA targets (Fig. 4)</b>                                  |                                       |                            |
|                                                                                                          |                                       |                            |
| <b>plasmid name</b>                                                                                      | <b>oligo1</b>                         | <b>oligo2</b>              |
| <b>sgRNA HEK site 1</b>                                                                                  | CACCGGAAAGACCCAGCATCCGT               | AAACACGGATGCTGGGTCTTTCCC   |
| <b>sgRNA HEK site 2</b>                                                                                  | CACCGAACACAAAGCATAGACTGC              | AAACGCAGTCTATGCTTTGTGTTC   |
| <b>sgRNA HEK site 3</b>                                                                                  | CACCGGCCAGACTGAGCACGTGA               | AAACTCACGTGCTCAGTCTGGGCC   |
| <b>sgRNA HEK site 4</b>                                                                                  | CACCGGCACTGCGGCTGGAGGTGG              | AAACCCACCTCCAGCCGAGTGCC    |
| <b>sgRNA CCR5</b>                                                                                        | CACCGGTACCTATCGATTGTCAGG              | AAACCCTGACAATCGATAGGTACC   |
| <b>sgRNA FANCF site 2</b>                                                                                | CACCGCTGCAGAAGGGATTCCATG              | AAACCATGGAATCCCTTCTGCAGC   |
| <b>sgRNA SCN5a</b>                                                                                       | CACCGTTGCACAGAAGGGTAGGCA              | AAACTGCCTACCCTTCTGTGCAAC   |
|                                                                                                          |                                       |                            |
| <b>Oligonucleotides used for cloning on-target screen, target plasmids (Fig. 5)</b>                      |                                       |                            |
|                                                                                                          |                                       |                            |
| <b>plasmid name</b>                                                                                      | <b>oligo1</b>                         | <b>oligo2</b>              |
| <b>On-target T1</b>                                                                                      | see "p1 inactive" cloning, above      |                            |
| <b>On-target T2</b>                                                                                      | CGTGCAGACAAGTAGCTTGCCGGTGG            | AAATCCACCGCAAGCTACTTGTCTG  |
| <b>On-target T3</b>                                                                                      | CGTGCAGACAAGTGCACGTAACCGG             | AAATCCGTTTACGTCGCACTTGTCTG |
| <b>On-target T4</b>                                                                                      | CGTGCAGACAAGTATGAACTTCAGGG            | AAATCCCTGAAGTTCATACTTGTCTG |
| <b>On-target T5</b>                                                                                      | CGTGCAGACAAGTATCTTCTTCAAGG            | AAATCCTGAAGAAGATACTTGTCTG  |
| <b>On-target T6</b>                                                                                      | CGTGCAGACAAGTAACTTCACCTCGG            | AAATCCGAGGTGAAGTACTTGTCTG  |
| <b>On-target T7</b>                                                                                      | CGTGCAGACAAGTATGGTCCTGCTGG            | AAATCCAGCAGGACCATACTTGTCTG |

|                                                                          |                             |                             |
|--------------------------------------------------------------------------|-----------------------------|-----------------------------|
| <b>On-target T8</b>                                                      | CGTGCAGACAAGTAGAGTGATCCCGG  | AAATCCGGGATCACTCTACTTGTCTG  |
| <b>On-target T9</b>                                                      | CGTGCAGACAAGTTTGAAGAAGATGG  | AAATCCATCTTCTTCAAACCTGTCTG  |
| <b>On-target T10</b>                                                     | CGTGCAGACAAGTGGCGACACCCTGG  | AAATCCAGGGTGTGCGCACTTGTCTG  |
| <b>On-target T11</b>                                                     | CGTGCAGACAAGTAGGGCGGACTGGG  | AAATCCCAGTCCGCCCTACTTGTCTG  |
| <b>On-target T12</b>                                                     | CGTGCAGACAAGTAGTGGTTGTGCGG  | AAATCCCAGACAACCACTACTTGTCTG |
| <b>On-target T13</b>                                                     | CGTGCAGACAAGTTCGCCCTCGCCGG  | AAATCCGGCGAGGGCGAACCTGTCTG  |
| <b>On-target T14</b>                                                     | CGTGCAGACAAGTATGCCACCTACGG  | AAATCCGTAGGTGGCATACTTGTCTG  |
| <b>On-target T15</b>                                                     | CGTGCAGACAAGTTGCACGCCGTAGG  | AAATCCTACGGCGTGCAACTTGTCTG  |
| <b>On-target T16</b>                                                     | CGTGCAGACAAGTTCGAGCTGAAGGG  | AAATCCCTCAGCTCGAACCTGTCTG   |
| <b>On-target T17</b>                                                     | CGTGCAGACAAGTTCACGAGGGTGGG  | AAATCCCACCCTCGTGAACCTGTCTG  |
| <b>On-target T18</b>                                                     | CGTGCAGACAAGTTCGGGCATGGCGG  | AAATCCGCCATGCCCGAACCTGTCTG  |
| <b>On-target T19</b>                                                     | CGTGCAGACAAGTTC AAGGAGGACGG | AAATCCGTCTCTTGAACCTGTCTG    |
| <b>On-target T20</b>                                                     | CGTGCAGACAAGTTGGTAGTGGTCGG  | AAATCCGACCACTACCAACTTGTCTG  |
| <b>On-target T21</b>                                                     | CGTGCAGACAAGTGGGTGGGCCAGGG  | AAATCCCTGGCCCACCACTTGTCTG   |
| <b>On-target T22</b>                                                     | CGTGCAGACAAGTCTGTTACCCGGG   | AAATCCCCGGTGAACAGACTTGTCTG  |
| <b>On-target T23</b>                                                     | CGTGCAGACAAGTGGCACCACCCCGG  | AAATCCGGGGTGGTGCCACTTGTCTG  |
| <b>On-target T24</b>                                                     | CGTGCAGACAAGTCTGGTTCGAGCTGG | AAATCCAGCTCGACCAGACTTGTCTG  |
| <b>On-target T25</b>                                                     | CGTGCAGACAAGTTCGACCAGGATGG  | AAATCCATCCTGGTTCGAACCTGTCTG |
| <b>On-target T26</b>                                                     | CGTGCAGACAAGTTCAGCGTGTCCGG  | AAATCCGGACACGCTGAACCTGTCTG  |
| <b>On-target T27</b>                                                     | CGTGCAGACAAGTAGGGTGGGCCAGG  | AAATCCTGGCCCACCCTACTTGTCTG  |
| <b>On-target T28</b>                                                     | CGTGCAGACAAGTGTCACGAGGGTGG  | AAATCCACCCTCGTGACACTTGTCTG  |
| <b>On-target T29</b>                                                     | CGTGCAGACAAGTGTGGTTCACGAGGG | AAATCCCTCGTGACCACACTTGTCTG  |
| <b>On-target T30</b>                                                     | CGTGCAGACAAGTCCGTAGGTCAGGG  | AAATCCCTGACCTACGGACTTGTCTG  |
| <b>On-target T31</b>                                                     | CGTGCAGACAAGTGTGCGGGTAGCGG  | AAATCCGCTACCCCGACACTTGTCTG  |
| <b>On-target T32</b>                                                     | CGTGCAGACAAGTATCGAGCTGAAGG  | AAATCCTCAGCTCGATACTTGTCTG   |
| <b>On-target T33</b>                                                     | CGTGCAGACAAGTGACTTCAAGGAGG  | AAATCCTCTTGAAGTCACTTGTCTG   |
| <b>On-target T34</b>                                                     | CGTGCAGACAAGTGTGCGCCGATGGG  | AAATCCCCATCGGCGACACTTGTCTG  |
|                                                                          |                             |                             |
|                                                                          |                             |                             |
| <b>Oligonucleotides used for cloning on-target screen sgRNA plasmids</b> |                             |                             |
|                                                                          |                             |                             |
| <b>plasmid name</b>                                                      | <b>oligo1</b>               | <b>oligo2</b>               |
| <b>sgRNA - On-target T1</b>                                              | CACCGCAGACAAGTGCATAGACTG    | AAACCAGTCTATGCACTTGTCTGC    |
| <b>sgRNA - On-target T2</b>                                              | CACCGCAGACAAGTAGCTTGCCGG    | AAACCCGGCAAGCTACTTGTCTGC    |
| <b>sgRNA - On-target T3</b>                                              | CACCGCAGACAAGTGCACGTA AAA   | AAACTTTACGTGCACTTGTCTGC     |
| <b>sgRNA - On-target T4</b>                                              | CACCGCAGACAAGTATGAACTTCA    | AAACTGAAGTTCATACTTGTCTGC    |
| <b>sgRNA - On-target T5</b>                                              | CACCGCAGACAAGTATCTTCTTCA    | AAACTGAAGAAGATACTTGTCTGC    |



|                                                                                          |                          |                            |
|------------------------------------------------------------------------------------------|--------------------------|----------------------------|
| sgRNA - On-target T6                                                                     | CACCGCAGACAAGTAACTTCACCT | AAACAGGTGAAGTTACTTGTCTGC   |
| sgRNA - On-target T7                                                                     | CACCGCAGACAAGTATGGTCCTGC | AAACGCAGGACCATACTTGTCTGC   |
| sgRNA - On-target T8                                                                     | CACCGCAGACAAGTAGAGTGATCC | AAACGGATCACTCTACTTGTCTGC   |
| sgRNA - On-target T9                                                                     | CACCGCAGACAAGTTTGAAGAAGA | AAACTCTTCTCAAACCTGTCTGC    |
| sgRNA - On-target T10                                                                    | CACCGCAGACAAGTGGCGACACCC | AAACGGGTGTGCCACTTGTCTGC    |
| sgRNA - On-target T11                                                                    | CACCGCAGACAAGTAGGGCGGACT | AAACAGTCCGCCCTACTTGTCTGC   |
| sgRNA - On-target T12                                                                    | CACCGCAGACAAGTAGTGGTTGTC | AAACGACAACCACTACTTGTCTGC   |
| sgRNA - On-target T13                                                                    | CACCGCAGACAAGTTCGCCCTCGC | AAACGCGAGGGCGAACTTGTCTGC   |
| sgRNA - On-target T14                                                                    | CACCGCAGACAAGTATGCCACCTA | AAACTAGGTGGCATACTTGTCTGC   |
| sgRNA - On-target T15                                                                    | CACCGCAGACAAGTTGCACGCCGT | AAACACGGCGTGAACCTTGTCTGC   |
| sgRNA - On-target T16                                                                    | CACCGCAGACAAGTTCGAGCTGAA | AAACTTCAGCTCGAACCTTGTCTGC  |
| sgRNA - On-target T17                                                                    | CACCGCAGACAAGTTCACGAGGGT | AAACACCCTCGTGAACCTTGTCTGC  |
| sgRNA - On-target T18                                                                    | CACCGCAGACAAGTTCGGGCATGG | AAACCCATGCCCGAACCTTGTCTGC  |
| sgRNA - On-target T19                                                                    | CACCGCAGACAAGTTCAAGGAGGA | AAACTCCTCCTTGAACCTTGTCTGC  |
| sgRNA - On-target T20                                                                    | CACCGCAGACAAGTTGGTAGTGGT | AAACACCACTACCAACTTGTCTGC   |
| sgRNA - On-target T21                                                                    | CACCGCAGACAAGTGGGTGGGCCA | AAACTGGCCCACCCACTTGTCTGC   |
| sgRNA - On-target T22                                                                    | CACCGCAGACAAGTCTGTTCACCG | AAACCGGTGAACAGACTTGTCTGC   |
| sgRNA - On-target T23                                                                    | CACCGCAGACAAGTGGCACCACCC | AAACGGGTGGTGCCACTTGTCTGC   |
| sgRNA - On-target T24                                                                    | CACCGCAGACAAGTCTGGTCGAGC | AAACGCTCGACCAGACTTGTCTGC   |
| sgRNA - On-target T25                                                                    | CACCGCAGACAAGTTCGACCAGGA | AAACTCCTGGTTCGAACCTTGTCTGC |
| sgRNA - On-target T26                                                                    | CACCGCAGACAAGTTCAGCGTGTC | AAACGACACGCTGAACCTTGTCTGC  |
| sgRNA - On-target T27                                                                    | CACCGCAGACAAGTAGGGTGGGCC | AAACGGCCCACCCTACTTGTCTGC   |
| sgRNA - On-target T28                                                                    | CACCGCAGACAAGTGTACGAGGG  | AAACCCCTCGTGACACTTGTCTGC   |
| sgRNA - On-target T29                                                                    | CACCGCAGACAAGTGTGGTCACGA | AAACTCGTGACCACACTTGTCTGC   |
| sgRNA - On-target T30                                                                    | CACCGCAGACAAGTCCGTAGGTCA | AAACTGACCTACGGACTTGTCTGC   |
| sgRNA - On-target T31                                                                    | CACCGCAGACAAGTGTGCGGGTAG | AAACCTACCCCGACACTTGTCTGC   |
| sgRNA - On-target T32                                                                    | CACCGCAGACAAGTATCGAGCTGA | AAACTCAGCTCGATACTTGTCTGC   |
| sgRNA - On-target T33                                                                    | CACCGCAGACAAGTGACTTCAAGG | AAACCCCTGAAGTCACTTGTCTGC   |
| sgRNA - On-target T34                                                                    | CACCGCAGACAAGTGTGCCGATG  | AAACCATCGGCGACACTTGTCTGC   |
|                                                                                          |                          |                            |
|                                                                                          |                          |                            |
| <b>Oligonucleotides used for cloning mismatching sgRNAs (Fig.6, Supplementary Fig.7)</b> |                          |                            |
|                                                                                          |                          |                            |
| <b>Target 1 mismatching sgRNAs (Fig. 6)</b>                                              |                          |                            |
|                                                                                          |                          |                            |
|                                                                                          |                          |                            |
| <b>plasmid name</b>                                                                      | <b>oligo1</b>            | <b>oligo2</b>              |
| T1-1MM1                                                                                  | CACCACAGACAAGTGCATAGACTG | AAACCACTATGCACTTGTCTGT     |

|          |                          |                           |
|----------|--------------------------|---------------------------|
| T1-1MM2  | CACCGTAGACAAGTGCATAGACTG | AAACCAGTCTATGCACTTGTCTAC  |
| T1-1MM3  | CACCGCGGACAAGTGCATAGACTG | AAACCAGTCTATGCACTTGTCCGC  |
| T1-1MM4  | CACCGCAAACAAGTGCATAGACTG | AAACCAGTCTATGCACTTGTTTGC  |
| T1-1MM5  | CACCGCAGGCAAGTGCATAGACTG | AAACCAGTCTATGCACTTGCCTGC  |
| T1-1MM6  | CACCGCAGATAAGTGCATAGACTG | AAACCAGTCTATGCACTTATCTGC  |
| T1-1MM7  | CACCGCAGACGAGTGCATAGACTG | AAACCAGTCTATGCACTCGTCTGC  |
| T1-1MM8  | CACCGCAGACAGGTGCATAGACTG | AAACCAGTCTATGCACCTGTCTGC  |
| T1-1MM9  | CACCGCAGACAAATGCATAGACTG | AAACCAGTCTATGCATTTGTCTGC  |
| T1-1MM10 | CACCGCAGACAAGAGCATAGACTG | AAACCAGTCTATGCTCTTGTCTGC  |
| T1-1MM11 | CACCGCAGACAAGTACATAGACTG | AAACCAGTCTATGTACTTGTCTGC  |
| T1-1MM12 | CACCGCAGACAAGTGTATAGACTG | AAACCAGTCTATACACTTGTCTGC  |
| T1-1MM13 | CACCGCAGACAAGTGCGTAGACTG | AAACCAGTCTACGCACTTGTCTGC  |
| T1-1MM14 | CACCGCAGACAAGTGCAAAGACTG | AAACCAGTCTTTGCACTTGTCTGC  |
| T1-1MM15 | CACCGCAGACAAGTGCATGGACTG | AAACCAGTCCATGCACTTGTCTGC  |
| T1-1MM16 | CACCGCAGACAAGTGCATAAACTG | AAACCAGTTTATGCACTTGTCTGC  |
| T1-1MM17 | CACCGCAGACAAGTGCATAGGCTG | AAACCAGCCTATGCACTTGTCTGC  |
| T1-1MM18 | CACCGCAGACAAGTGCATAGATTG | AAACCAATCTATGCACTTGTCTGC  |
| T1-1MM19 | CACCGCAGACAAGTGCATAGACAG | AAACCTGTCTATGCACTTGTCTGC  |
| T1-1MM20 | CACCGCAGACAAGTGCATAGACTA | AAACTAGTCTATGCACTTGTCTGC  |
| T1-2MM1  | CACCATAGACAAGTGCATAGACTG | AAACCAGTCTATGCACTTGTCTAT  |
| T1-2MM2  | CACCGTGGACAAGTGCATAGACTG | AAACCAGTCTATGCACTTGTCCAC  |
| T1-2MM3  | CACCGCGAACAAGTGCATAGACTG | AAACCAGTCTATGCACTTGTTCGC  |
| T1-2MM5  | CACCGCAGGTAAGTGCATAGACTG | AAACCAGTCTATGCACTTACCTGC  |
| T1-2MM7  | CACCGCAGACGGGTGCATAGACTG | AAACCAGTCTATGCACCCGTCTGC  |
| T1-2MM9  | CACCGCAGACAAAAGCATAGACTG | AAACCAGTCTATGCTTTTGTCTGC  |
| T1-2MM11 | CACCGCAGACAAGTATATAGACTG | AAACCAGTCTATATACTTGTCTGC  |
| T1-2MM13 | CACCGCAGACAAGTGCGAAGACTG | AAACCAGTCTTCGCACTTGTCTGC  |
| T1-2MM15 | CACCGCAGACAAGTGCATGAACTG | AAACCAGTTCATGCACTTGTCTGC  |
| T1-2MM17 | CACCGCAGACAAGTGCATAGGTTG | AAACCAACCTATGCACTTGTCTGC  |
| T1-2MM19 | CACCGCAGACAAGTGCATAGACAA | AAACTTGTCTATGCACTTGTCTGC  |
| T1-3MM1  | CACCATGGACAAGTGCATAGACTG | AAACCAGTCTATGCACTTGTCCAT  |
| T1-3MM2  | CACCGTGAACAAGTGCATAGACTG | AAACCAGTCTATGCACTTGTTCAC  |
| T1-3MM3  | CACCGCGAGCAAGTGCATAGACTG | AAACCAGTCTATGCACTTGTCTCGC |
| T1-3MM6  | CACCGCAGATGGGTGCATAGACTG | AAACCAGTCTATGCACCCATCTGC  |
| T1-3MM9  | CACCGCAGACAAAACATAGACTG  | AAACCAGTCTATGTTTTTGTCTGC  |
| T1-3MM12 | CACCGCAGACAAGTGTGAAGACTG | AAACCAGTCTTCACACTTGTCTGC  |
| T1-3MM15 | CACCGCAGACAAGTGCATGAGCTG | AAACCAGTCTATGCACTTGTCTGC  |

|                                                          |                           |                           |
|----------------------------------------------------------|---------------------------|---------------------------|
| T1-3MM18                                                 | CACCGCAGACAAGTGCATAGATAA  | AAACTTATCTATGCACTTGTCTGC  |
| T1-4MM1                                                  | CACCATGAACAAGTGCATAGACTG  | AAACCAGTCTATGCACTTGTTCAT  |
| T1-4MM2                                                  | CACCGTGAGCAAGTGCATAGACTG  | AAACCAGTCTATGCACTTGTCTGC  |
| T1-4MM5                                                  | CACCGCAGGTGGGTGCATAGACTG  | AAACCAGTCTATGCACCCACCTGC  |
| T1-4MM9                                                  | CACCGCAGACAAAAATATAGACTG  | AAACCAGTCTATATTTTTGTCTGC  |
| T1-4MM13                                                 | CACCGCAGACAAGTGCGAGAAGTGC | AAACCAGTCTCTCGCACTTGTCTGC |
| T1-4MM17                                                 | CACCGCAGACAAGTGCATAGGTAA  | AAACTTACCTATGCACTTGTCTGC  |
| T1-5MM1                                                  | CACCATGAGCAAGTGCATAGACTG  | AAACCAGTCTATGCACTTGTCTGC  |
| T1-5MM2                                                  | CACCGTGAGTAAGTGCATAGACTG  | AAACCAGTCTATGCACTTACTCAC  |
| T1-5MM6                                                  | CACCGCAGATGGAAGCATAGACTG  | AAACCAGTCTATGCTTCCATCTGC  |
| T1-5MM11                                                 | CACCGCAGACAAGTATGAGGACTG  | AAACCAGTCTCATACTTGTCTGC   |
| T1-5MM16                                                 | CACCGCAGACAAGTGCATAAGTAA  | AAACTTACTTATGCACTTGTCTGC  |
|                                                          |                           |                           |
|                                                          |                           |                           |
|                                                          |                           |                           |
| <b>Target 2 mismatching sgRNAs (Supplementary Fig.7)</b> |                           |                           |
|                                                          |                           |                           |
| <b>plasmid name</b>                                      | <b>oligo1</b>             | <b>oligo2</b>             |
| T2-1MM1                                                  | CACCACAGACAAGTAGCTTGCCGG  | AAACCCGGCAAGCTACTTGTCTGT  |
| T2-1MM2                                                  | CACCGTAGACAAGTAGCTTGCCGG  | AAACCCGGCAAGCTACTTGTCTAC  |
| T2-1MM3                                                  | CACCGCGGACAAGTAGCTTGCCGG  | AAACCCGGCAAGCTACTTGTCCGC  |
| T2-1MM4                                                  | CACCGCAAACAAGTAGCTTGCCGG  | AAACCCGGCAAGCTACTTGTTTGC  |
| T2-1MM5                                                  | CACCGCAGGCAAGTAGCTTGCCGG  | AAACCCGGCAAGCTACTTGCCTGC  |
| T2-1MM6                                                  | CACCGCAGATAAGTAGCTTGCCGG  | AAACCCGGCAAGCTACTTATCTGC  |
| T2-1MM7                                                  | CACCGCAGACGAGTAGCTTGCCGG  | AAACCCGGCAAGCTACTCGTCTGC  |
| T2-1MM8                                                  | CACCGCAGACAGGTAGCTTGCCGG  | AAACCCGGCAAGCTACCTGTCTGC  |
| T2-1MM9                                                  | CACCGCAGACAAATAGCTTGCCGG  | AAACCCGGCAAGCTATTTGTCTGC  |
| T2-1MM10                                                 | CACCGCAGACAAGCAGCTTGCCGG  | AAACCCGGCAAGCTGCTTGTCTGC  |
| T2-1MM11                                                 | CACCGCAGACAAGTGGCTTGCCGG  | AAACCCGGCAAGCCACTTGTCTGC  |
| T2-1MM12                                                 | CACCGCAGACAAGTAACTTGCCGG  | AAACCCGGCAAGTTACTTGTCTGC  |
| T2-1MM13                                                 | CACCGCAGACAAGTAGTTTGCCGG  | AAACCCGGCAAACACTTGTCTGC   |
| T2-1MM14                                                 | CACCGCAGACAAGTAGCCTGCCGG  | AAACCCGGCAGGCTACTTGTCTGC  |
| T2-1MM15                                                 | CACCGCAGACAAGTAGCTCGCCGG  | AAACCCGGCGAGCTACTTGTCTGC  |
| T2-1MM16                                                 | CACCGCAGACAAGTAGCTTACCGG  | AAACCCGGTAAGCTACTTGTCTGC  |
| T2-1MM17                                                 | CACCGCAGACAAGTAGCTTGTCCG  | AAACCCGACAAGCTACTTGTCTGC  |
| T2-1MM18                                                 | CACCGCAGACAAGTAGCTTGTCTGG | AAACCCAGCAAGCTACTTGTCTGC  |
| T2-1MM19                                                 | CACCGCAGACAAGTAGCTTGCCAG  | AAACCTGGCAAGCTACTTGTCTGC  |

|                                                          |                          |                          |
|----------------------------------------------------------|--------------------------|--------------------------|
| T2-1MM20                                                 | CACCGCAGACAAGTAGCTTGCCGA | AAACTCGGCAAGCTACTTGTCTGC |
| T2-2MM1                                                  | CACCATAGACAAGTAGCTTGCCGG | AAACCCGGCAAGCTACTTGTCTAT |
| T2-2MM2                                                  | CACCGTGGACAAGTAGCTTGCCGG | AAACCCGGCAAGCTACTTGTCCAC |
| T2-2MM3                                                  | CACCGCGAACAAGTAGCTTGCCGG | AAACCCGGCAAGCTACTTGTTCGC |
| T2-2MM5                                                  | CACCGCAGGTAAGTAGCTTGCCGG | AAACCCGGCAAGCTACTTACCTGC |
| T2-2MM7                                                  | CACCGCAGACGGGTAGCTTGCCGG | AAACCCGGCAAGCTACCCGTCTGC |
| T2-2MM9                                                  | CACCGCAGACAAACAGCTTGCCGG | AAACCCGGCAAGCTGTTTGTCTGC |
| T2-2MM11                                                 | CACCGCAGACAAGTGACTTGCCGG | AAACCCGGCAAGTCACTTGTCTGC |
| T2-2MM13                                                 | CACCGCAGACAAGTAGTCTGCCGG | AAACCCGGCAGACTACTTGTCTGC |
| T2-2MM15                                                 | CACCGCAGACAAGTAGCTCACCGG | AAACCCGGTGAGCTACTTGTCTGC |
| T2-2MM17                                                 | CACCGCAGACAAGTAGCTTGTGG  | AAACCCAACAAGCTACTTGTCTGC |
| T2-2MM19                                                 | CACCGCAGACAAGTAGCTTGCCAA | AAACTTGGCAAGCTACTTGTCTGC |
|                                                          |                          |                          |
|                                                          |                          |                          |
| <b>Target 6 mismatching sgRNAs (Supplementary Fig.7)</b> |                          |                          |
|                                                          |                          |                          |
| <b>plasmid name</b>                                      | <b>oligo1</b>            | <b>oligo2</b>            |
| T6-1MM1                                                  | CACCACAGACAAGTAACTTCACCT | AAACAGGTGAAGTTACTTGTCTGT |
| T6-1MM2                                                  | CACCGTAGACAAGTAACTTCACCT | AAACAGGTGAAGTTACTTGTCTAC |
| T6-1MM3                                                  | CACCGCGGACAAGTAACTTCACCT | AAACAGGTGAAGTTACTTGTCCGC |
| T6-1MM4                                                  | CACCGCAAACAAGTAACTTCACCT | AAACAGGTGAAGTTACTTGTTTGC |
| T6-1MM5                                                  | CACCGCAGGCAAGTAACTTCACCT | AAACAGGTGAAGTTACTTGCCTGC |
| T6-1MM6                                                  | CACCGCAGATAAGTAACTTCACCT | AAACAGGTGAAGTTACTTATCTGC |
| T6-1MM7                                                  | CACCGCAGACGAGTAACTTCACCT | AAACAGGTGAAGTTACTCGTCTGC |
| T6-1MM8                                                  | CACCGCAGACAGGTAACTTCACCT | AAACAGGTGAAGTTACCTGTCTGC |
| T6-1MM9                                                  | CACCGCAGACAAATAACTTCACCT | AAACAGGTGAAGTTATTTGTCTGC |
| T6-1MM10                                                 | CACCGCAGACAAGCAACTTCACCT | AAACAGGTGAAGTTGCTTGTCTGC |
| T6-1MM11                                                 | CACCGCAGACAAGTGACTTCACCT | AAACAGGTGAAGTCACTTGTCTGC |
| T6-1MM12                                                 | CACCGCAGACAAGTAGCTTCACCT | AAACAGGTGAAGCTACTTGTCTGC |
| T6-1MM13                                                 | CACCGCAGACAAGTAATTCACCT  | AAACAGGTGAAATTACTTGTCTGC |
| T6-1MM14                                                 | CACCGCAGACAAGTAACCTCACCT | AAACAGGTGAGGTTACTTGTCTGC |
| T6-1MM15                                                 | CACCGCAGACAAGTAACTCCACCT | AAACAGGTGGAGTTACTTGTCTGC |
| T6-1MM16                                                 | CACCGCAGACAAGTAACTTTACCT | AAACAGGTAAAGTTACTTGTCTGC |
| T6-1MM17                                                 | CACCGCAGACAAGTAACTTCGCCT | AAACAGGCGAAGTTACTTGTCTGC |
| T6-1MM18                                                 | CACCGCAGACAAGTAACTTCATCT | AAACAGATGAAGTTACTTGTCTGC |
| T6-1MM19                                                 | CACCGCAGACAAGTAACTTCACTT | AAACAAGTGAAGTTACTTGTCTGC |
| T6-1MM20                                                 | CACCGCAGACAAGTAACTTACCCT | AAACGGGTGAAGTTACTTGTCTGC |

|                                                           |                           |                           |
|-----------------------------------------------------------|---------------------------|---------------------------|
| T6-2MM1                                                   | CACCATAGACAAGTAACTTCACCT  | AAACAGGTGAAGTTACTTGTCTAT  |
| T6-2MM2                                                   | CACCGTGGACAAGTAACTTCACCT  | AAACAGGTGAAGTTACTTGTCCAC  |
| T6-2MM3                                                   | CACCGCGAACAAGTAACTTCACCT  | AAACAGGTGAAGTTACTTGTTCGC  |
| T6-2MM5                                                   | CACCGCAGGTAAGTAACTTCACCT  | AAACAGGTGAAGTTACTTACCTGC  |
| T6-2MM7                                                   | CACCGCAGACGGGTAACTTCACCT  | AAACAGGTGAAGTTACCCGTCTGC  |
| T6-2MM9                                                   | CACCGCAGACAAACA ACTTCACCT | AAACAGGTGAAGTTGTTTGTCTGC  |
| T6-2MM11                                                  | CACCGCAGACAAGTGGCTTCACCT  | AAACAGGTGAAGCCACTTGTCTGC  |
| T6-2MM13                                                  | CACCGCAGACAAGTAATCTCACCT  | AAACAGGTGAGATTACTTGTCTGC  |
| T6-2MM15                                                  | CACCGCAGACAAGTAACTCTACCT  | AAACAGGTAGAGTTACTTGTCTGC  |
| T6-2MM17                                                  | CACCGCAGACAAGTAACTTCGTCT  | AAACAGACGAAGTTACTTGTCTGC  |
| T6-2MM19                                                  | CACCGCAGACAAGTAACTTCACTC  | AAACGAGTGAAGTTACTTGTCTGC  |
|                                                           |                           |                           |
|                                                           |                           |                           |
| <b>Target 17 mismatching sgRNAs (Supplementary Fig.7)</b> |                           |                           |
|                                                           |                           |                           |
| <b>plasmid name</b>                                       | <b>oligo1</b>             | <b>oligo2</b>             |
| T17-1MM1                                                  | CACCACAGACAAGTTCACGAGGGT  | AAACACCCTCGTGA ACTTGTCTGT |
| T17-1MM2                                                  | CACCGTAGACAAGTTCACGAGGGT  | AAACACCCTCGTGA ACTTGTCTAC |
| T17-1MM3                                                  | CACCGCGGACAAGTTCACGAGGGT  | AAACACCCTCGTGA ACTTGTCCGC |
| T17-1MM4                                                  | CACCGCAAACAAGTTCACGAGGGT  | AAACACCCTCGTGA ACTTGTTTGC |
| T17-1MM5                                                  | CACCGCAGGCAAGTTCACGAGGGT  | AAACACCCTCGTGA ACTTGCCTGC |
| T17-1MM6                                                  | CACCGCAGATAAGTTCACGAGGGT  | AAACACCCTCGTGA ACTTATCTGC |
| T17-1MM7                                                  | CACCGCAGACGAGTTCACGAGGGT  | AAACACCCTCGTGA ACTCGTCTGC |
| T17-1MM8                                                  | CACCGCAGACAGGTTACGAGGGT   | AAACACCCTCGTGA ACTGTCTGC  |
| T17-1MM9                                                  | CACCGCAGACAAATTCACGAGGGT  | AAACACCCTCGTGA ATTTGTCTGC |
| T17-1MM10                                                 | CACCGCAGACAAGCTCACGAGGGT  | AAACACCCTCGTGAGCTTGTCTGC  |
| T17-1MM11                                                 | CACCGCAGACAAGTCCACGAGGGT  | AAACACCCTCGTGGACTTGTCTGC  |
| T17-1MM12                                                 | CACCGCAGACAAGTTTACGAGGGT  | AAACACCCTCGTAAACTTGTCTGC  |
| T17-1MM13                                                 | CACCGCAGACAAGTTCGCGAGGGT  | AAACACCCTCGCGA ACTTGTCTGC |
| T17-1MM14                                                 | CACCGCAGACAAGTTCATGAGGGT  | AAACACCCTCATGA ACTTGTCTGC |
| T17-1MM15                                                 | CACCGCAGACAAGTTCACAAGGGT  | AAACACCCTTGTGA ACTTGTCTGC |
| T17-1MM16                                                 | CACCGCAGACAAGTTCACGGGGT   | AAACACCCCTGTA ACTTGTCTGC  |
| T17-1MM17                                                 | CACCGCAGACAAGTTCACGAAGGT  | AAACACCTTCGTGA ACTTGTCTGC |
| T17-1MM18                                                 | CACCGCAGACAAGTTCACGAGAGT  | AAACACTCTCGTGA ACTTGTCTGC |
| T17-1MM19                                                 | CACCGCAGACAAGTTCACGAGGAT  | AAACATCCTCGTGA ACTTGTCTGC |
| T17-1MM20                                                 | CACCGCAGACAAGTTCACGAGGGC  | AAACGCCCTCGTGA ACTTGTCTGC |
| T17-2MM1                                                  | CACCATAGACAAGTTCACGAGGGT  | AAACACCCTCGTGA ACTTGTCTAT |

|                                         |                                              |                          |
|-----------------------------------------|----------------------------------------------|--------------------------|
| <b>T17-2MM2</b>                         | CACCGTGGACAAGTTCACGAGGGT                     | AAACACCCTCGTGAACTTGTCCAC |
| <b>T17-2MM3</b>                         | CACCGCGAACAAGTTCACGAGGGT                     | AAACACCCTCGTGAACTTGTTCGC |
| <b>T17-2MM5</b>                         | CACCGCAGGTAAGTTCACGAGGGT                     | AAACACCCTCGTGAACTTACCTGC |
| <b>T17-2MM7</b>                         | CACCGCAGACGGGTTCACGAGGGT                     | AAACACCCTCGTGAACCCGTCTGC |
| <b>T17-2MM9</b>                         | CACCGCAGACAAACTCACGAGGGT                     | AAACACCCTCGTGAGTTTGTCTGC |
| <b>T17-2MM11</b>                        | CACCGCAGACAAGTCTACGAGGGT                     | AAACACCCTCGTAGACTTGTCTGC |
| <b>T17-2MM13</b>                        | CACCGCAGACAAGTTCGTGAGGGT                     | AAACACCCTCACGAACTTGTCTGC |
| <b>T17-2MM15</b>                        | CACCGCAGACAAGTTCACAGGGT                      | AAACACCCTGTGAACTTGTCTGC  |
| <b>T17-2MM17</b>                        | CACCGCAGACAAGTTCACGAAAGT                     | AAACACTTTCGTGAACTTGTCTGC |
| <b>T17-2MM19</b>                        | CACCGCAGACAAGTTCACGAGGAC                     | AAACGTCCTCGTGAACTTGTCTGC |
|                                         |                                              |                          |
|                                         |                                              |                          |
| <b>Oligos for cloning BEAR-GFP-2in1</b> |                                              |                          |
| BEAR-GFP-2in1-for                       | g'gcacatcgcccacagtcCGTTACATAACTTACGGTAAATG   |                          |
| BEAR-GFP-2in1-rev                       | TTGCTGGCCTTTTGCTCAgcTAAGATACATTGATGAGTTTGGAC |                          |

### Supplementary Table 3 – List of NGS primers and NGS indexing

| Genomic primers for NGS (1 <sup>st</sup> step PCR) |                                                              |                                                               |
|----------------------------------------------------|--------------------------------------------------------------|---------------------------------------------------------------|
| Amplicon                                           | Fwd (i5) primer                                              | Rev (i7) primer                                               |
| HEK-SITE1                                          | TCGTCGGCAGCGTCAGATGTGTATAAGAG<br>ACAGTCCCCTGTAGTTTCGGCAATAG  | GTCTCGTGGGCTCGGAGATGTGTATAAAGA<br>GACAGCTGGAGGGCAAGTGCTGTCT   |
| HEK-SITE2                                          | TCGTCGGCAGCGTCAGATGTGTATAAGAG<br>ACAGGTCCAGCCCCATCTGTCAAA    | GTCTCGTGGGCTCGGAGATGTGTATAAAGA<br>GACAGAGGACGTCTGCCCAATATGT   |
| HEK-SITE3                                          | TCGTCGGCAGCGTCAGATGTGTATAAGAG<br>ACAGCCCAGCCAAACTTGTCAACC    | GTCTCGTGGGCTCGGAGATGTGTATAAAGA<br>GACAGGGGAAACGCCCATGCAATTA   |
| HEK-SITE4                                          | TCGTCGGCAGCGTCAGATGTGTATAAGAG<br>ACAGTCCTTTCAACCCGAACGGAG    | GTCTCGTGGGCTCGGAGATGTGTATAAAGA<br>GACAGGGAAACCCAGGTAGCCAGAGAC |
| CCR5                                               | TCGTCGGCAGCGTCAGATGTGTATAAGAG<br>ACAGTTCTGGGAGAGACGCAAAAC    | GTCTCGTGGGCTCGGAGATGTGTATAAAGA<br>GACAGTTCTGGGCTCACTATGCTGC   |
| FANCF-SITE2                                        | TCGTCGGCAGCGTCAGATGTGTATAAGAG<br>ACAGGGTGCTGACGTAGGTAGTGC    | GTCTCGTGGGCTCGGAGATGTGTATAAAGA<br>GACAGACACGGATAAAGACGCTGGG   |
| SCN5a                                              | TCGTCGGCAGCGTCAGATGTGTATAAGAG<br>ACAGGGCAAACCTTCTATTACCTCGGG | GTCTCGTGGGCTCGGAGATGTGTATAAAGA<br>GACAGCCCAGAGCCTCATGAGCCAC   |

| Indexing primers (2 <sup>nd</sup> step PCR) |                                                                |
|---------------------------------------------|----------------------------------------------------------------|
| i5 indexing primer                          | AATGATACGGCGACCACCGAGATCTACAC- <i>i5 index</i> -TCGTCGGCAGCGTC |
| i7 indexing primer                          | CAAGCAGAAGACGGCATACGAGAT- <i>i7 index</i> -GTCTCGTGGGCTCGG     |

| i5 and i7 indices |          |
|-------------------|----------|
|                   |          |
| i5-S513           | TCGACTAG |
| i5-S515           | TTCTAGCT |
| i5-S516           | CCTAGAGT |
| i5-S518           | CTATTAAG |
| i5-S520           | AAGGCTAT |
| i5-S521           | GAGCCTTA |
| i5-S522           | TTATGCGA |
|                   |          |
| i7-N701           | TCGCCTTA |
| i7-N702           | CTAGTACG |
| i7-N703           | TTCTGCCT |
| i7-N704           | GCTCAGGA |
| i7-N705           | AGGAGTCC |
| i7-N706           | CATGCCTA |
| i7-N707           | GTAGAGAG |
| i7-N710           | CAGCCTCG |
| i7-N711           | TGCCTCTT |
| i7-N712           | TCCTCTAC |
| i7-N714           | TCATGAGC |
| i7-N715           | CCTGAGAT |

| Sample indexing for NGS |                |                         |                     |           |          |          |
|-------------------------|----------------|-------------------------|---------------------|-----------|----------|----------|
| Sample name             | Base editor    | Enrichment              | Parallel experiment | Amplicon  | i5 index | i7 index |
| 1                       | ABE            | No enrichment           | 1                   | HEK-SITE1 | S513     | N701     |
| 2                       | ABE            | Transfection enrichment | 1                   | HEK-SITE1 | S513     | N702     |
| 3                       | ABE            | BEAR enrichment         | 1                   | HEK-SITE1 | S513     | N703     |
| 4                       | ABE            | No enrichment           | 2                   | HEK-SITE1 | S513     | N704     |
| 5                       | ABE            | Transfection enrichment | 2                   | HEK-SITE1 | S513     | N705     |
| 6                       | ABE            | BEAR enrichment         | 2                   | HEK-SITE1 | S513     | N706     |
| 7                       | ABE            | No enrichment           | 3                   | HEK-SITE1 | S513     | N707     |
| 8                       | ABE            | Transfection enrichment | 3                   | HEK-SITE1 | S513     | N710     |
| 9                       | ABE            | BEAR enrichment         | 3                   | HEK-SITE1 | S513     | N711     |
| 10                      | dABE           | No enrichment           | 1                   | HEK-SITE1 | S513     | N712     |
| 11                      | dABE           | Transfection enrichment | 1                   | HEK-SITE1 | S513     | N714     |
| 12                      | dABE           | BEAR enrichment         | 1                   | HEK-SITE1 | S513     | N715     |
| 13                      | dABE           | No enrichment           | 2                   | HEK-SITE1 | S515     | N701     |
| 14                      | dABE           | Transfection enrichment | 2                   | HEK-SITE1 | S515     | N702     |
| 15                      | dABE           | BEAR enrichment         | 2                   | HEK-SITE1 | S515     | N703     |
| 16                      | dABE           | No enrichment           | 3                   | HEK-SITE1 | S515     | N704     |
| 17                      | dABE           | Transfection enrichment | 3                   | HEK-SITE1 | S515     | N705     |
| 18                      | dABE           | BEAR enrichment         | 3                   | HEK-SITE1 | S515     | N706     |
| 19                      | no base editor | N/A                     | 1                   | HEK-SITE1 | S515     | N707     |
| 20                      | no base editor | N/A                     | 2                   | HEK-SITE1 | S515     | N710     |
| 21                      | no base editor | N/A                     | 3                   | HEK-SITE1 | S515     | N711     |
| 22                      | ABE            | No enrichment           | 1                   | HEK-SITE2 | S515     | N712     |
| 23                      | ABE            | Transfection enrichment | 1                   | HEK-SITE2 | S515     | N714     |
| 24                      | ABE            | BEAR enrichment         | 1                   | HEK-SITE2 | S515     | N715     |
| 25                      | ABE            | No enrichment           | 2                   | HEK-SITE2 | S516     | N701     |
| 26                      | ABE            | Transfection enrichment | 2                   | HEK-SITE2 | S516     | N702     |
| 27                      | ABE            | BEAR enrichment         | 2                   | HEK-SITE2 | S516     | N703     |
| 28                      | ABE            | No enrichment           | 3                   | HEK-SITE2 | S516     | N704     |
| 29                      | ABE            | Transfection enrichment | 3                   | HEK-SITE2 | S516     | N705     |
| 30                      | ABE            | BEAR enrichment         | 3                   | HEK-SITE2 | S516     | N706     |
| 31                      | dABE           | No enrichment           | 1                   | HEK-SITE2 | S516     | N707     |
| 32                      | dABE           | Transfection enrichment | 1                   | HEK-SITE2 | S516     | N710     |
| 33                      | dABE           | BEAR enrichment         | 1                   | HEK-SITE2 | S516     | N711     |
| 34                      | dABE           | No enrichment           | 2                   | HEK-SITE2 | S516     | N712     |
| 35                      | dABE           | Transfection enrichment | 2                   | HEK-SITE2 | S516     | N714     |
| 36                      | dABE           | BEAR enrichment         | 2                   | HEK-SITE2 | S516     | N715     |
| 37                      | dABE           | No enrichment           | 3                   | HEK-SITE2 | S518     | N701     |
| 38                      | dABE           | Transfection enrichment | 3                   | HEK-SITE2 | S518     | N702     |
| 39                      | dABE           | BEAR enrichment         | 3                   | HEK-SITE2 | S518     | N703     |
| 40                      | no base editor | N/A                     | 1                   | HEK-SITE2 | S518     | N704     |
| 41                      | no base editor | N/A                     | 2                   | HEK-SITE2 | S518     | N705     |
| 42                      | no base editor | N/A                     | 3                   | HEK-SITE2 | S518     | N706     |
| 43                      | ABE            | No enrichment           | 1                   | HEK-SITE3 | S518     | N707     |
| 44                      | ABE            | Transfection enrichment | 1                   | HEK-SITE3 | S518     | N710     |
| 45                      | ABE            | BEAR enrichment         | 1                   | HEK-SITE3 | S518     | N711     |
| 46                      | ABE            | No enrichment           | 2                   | HEK-SITE3 | S518     | N712     |
| 47                      | ABE            | Transfection enrichment | 2                   | HEK-SITE3 | S518     | N714     |
| 48                      | ABE            | BEAR enrichment         | 2                   | HEK-SITE3 | S518     | N715     |
| 49                      | ABE            | No enrichment           | 3                   | HEK-SITE3 | S520     | N701     |
| 50                      | ABE            | Transfection enrichment | 3                   | HEK-SITE3 | S520     | N702     |



|     |                |                         |   |           |      |      |
|-----|----------------|-------------------------|---|-----------|------|------|
| 51  | ABE            | BEAR enrichment         | 3 | HEK-SITE3 | S520 | N703 |
| 52  | dABE           | No enrichment           | 1 | HEK-SITE3 | S520 | N704 |
| 53  | dABE           | Transfection enrichment | 1 | HEK-SITE3 | S520 | N705 |
| 54  | dABE           | BEAR enrichment         | 1 | HEK-SITE3 | S520 | N706 |
| 55  | dABE           | No enrichment           | 2 | HEK-SITE3 | S520 | N707 |
| 56  | dABE           | Transfection enrichment | 2 | HEK-SITE3 | S520 | N710 |
| 57  | dABE           | BEAR enrichment         | 2 | HEK-SITE3 | S520 | N711 |
| 58  | dABE           | No enrichment           | 3 | HEK-SITE3 | S520 | N712 |
| 59  | dABE           | Transfection enrichment | 3 | HEK-SITE3 | S520 | N714 |
| 60  | dABE           | BEAR enrichment         | 3 | HEK-SITE3 | S520 | N715 |
| 61  | CBE            | No enrichment           | 1 | HEK-SITE3 | S521 | N701 |
| 62  | CBE            | No enrichment           | 2 | HEK-SITE3 | S521 | N702 |
| 63  | CBE            | No enrichment           | 3 | HEK-SITE3 | S521 | N703 |
| 64  | dCBE           | No enrichment           | 1 | HEK-SITE3 | S521 | N704 |
| 65  | dCBE           | Transfection enrichment | 1 | HEK-SITE3 | S521 | N705 |
| 66  | dCBE           | BEAR enrichment         | 1 | HEK-SITE3 | S521 | N706 |
| 67  | dCBE           | No enrichment           | 2 | HEK-SITE3 | S521 | N707 |
| 68  | dCBE           | Transfection enrichment | 2 | HEK-SITE3 | S521 | N710 |
| 69  | dCBE           | BEAR enrichment         | 2 | HEK-SITE3 | S521 | N711 |
| 70  | dCBE           | No enrichment           | 3 | HEK-SITE3 | S521 | N712 |
| 71  | dCBE           | Transfection enrichment | 3 | HEK-SITE3 | S521 | N714 |
| 72  | dCBE           | BEAR enrichment         | 3 | HEK-SITE3 | S521 | N715 |
| 73  | no base editor | N/A                     | 1 | HEK-SITE3 | S522 | N701 |
| 74  | no base editor | N/A                     | 2 | HEK-SITE3 | S522 | N702 |
| 75  | no base editor | N/A                     | 3 | HEK-SITE3 | S522 | N703 |
| 76  | CBE            | No enrichment           | 1 | HEK-SITE4 | S522 | N704 |
| 77  | CBE            | No enrichment           | 2 | HEK-SITE4 | S522 | N705 |
| 78  | CBE            | No enrichment           | 3 | HEK-SITE4 | S522 | N706 |
| 79  | dCBE           | No enrichment           | 1 | HEK-SITE4 | S522 | N707 |
| 80  | dCBE           | Transfection enrichment | 1 | HEK-SITE4 | S522 | N710 |
| 81  | dCBE           | BEAR enrichment         | 1 | HEK-SITE4 | S522 | N711 |
| 82  | dCBE           | No enrichment           | 2 | HEK-SITE4 | S522 | N712 |
| 83  | dCBE           | Transfection enrichment | 2 | HEK-SITE4 | S522 | N714 |
| 84  | dCBE           | BEAR enrichment         | 2 | HEK-SITE4 | S513 | N701 |
| 85  | dCBE           | No enrichment           | 3 | HEK-SITE4 | S513 | N702 |
| 86  | dCBE           | Transfection enrichment | 3 | HEK-SITE4 | S513 | N703 |
| 87  | dCBE           | BEAR enrichment         | 3 | HEK-SITE4 | S513 | N704 |
| 88  | no base editor | N/A                     | 1 | HEK-SITE4 | S513 | N705 |
| 89  | no base editor | N/A                     | 2 | HEK-SITE4 | S513 | N706 |
| 90  | no base editor | N/A                     | 3 | HEK-SITE4 | S513 | N707 |
| 91  | ABE            | No enrichment           | 1 | CCR5      | S513 | N710 |
| 92  | ABE            | Transfection enrichment | 1 | CCR5      | S513 | N711 |
| 93  | ABE            | BEAR enrichment         | 1 | CCR5      | S513 | N712 |
| 94  | ABE            | No enrichment           | 2 | CCR5      | S513 | N714 |
| 95  | ABE            | Transfection enrichment | 2 | CCR5      | S513 | N715 |
| 96  | ABE            | BEAR enrichment         | 2 | CCR5      | S515 | N701 |
| 97  | ABE            | No enrichment           | 3 | CCR5      | S515 | N702 |
| 98  | ABE            | Transfection enrichment | 3 | CCR5      | S515 | N703 |
| 99  | ABE            | BEAR enrichment         | 3 | CCR5      | S515 | N704 |
| 100 | dABE           | No enrichment           | 1 | CCR5      | S515 | N705 |
| 101 | dABE           | Transfection enrichment | 1 | CCR5      | S515 | N706 |
| 102 | dABE           | BEAR enrichment         | 1 | CCR5      | S515 | N707 |
| 103 | dABE           | No enrichment           | 2 | CCR5      | S515 | N710 |
| 104 | dABE           | Transfection enrichment | 2 | CCR5      | S515 | N711 |
| 105 | dABE           | BEAR enrichment         | 2 | CCR5      | S515 | N712 |
| 106 | dABE           | No enrichment           | 3 | CCR5      | S515 | N714 |
| 107 | dABE           | Transfection enrichment | 3 | CCR5      | S515 | N715 |
| 108 | dABE           | BEAR enrichment         | 3 | CCR5      | S516 | N701 |
| 109 | CBE            | No enrichment           | 1 | CCR5      | S516 | N702 |

|     |                |                         |   |             |      |      |
|-----|----------------|-------------------------|---|-------------|------|------|
| 110 | CBE            | No enrichment           | 2 | CCR5        | S516 | N703 |
| 111 | CBE            | No enrichment           | 3 | CCR5        | S516 | N704 |
| 112 | dCBE           | No enrichment           | 1 | CCR5        | S516 | N705 |
| 113 | dCBE           | Transfection enrichment | 1 | CCR5        | S516 | N706 |
| 114 | dCBE           | BEAR enrichment         | 1 | CCR5        | S516 | N707 |
| 115 | dCBE           | No enrichment           | 2 | CCR5        | S516 | N710 |
| 116 | dCBE           | Transfection enrichment | 2 | CCR5        | S516 | N711 |
| 117 | dCBE           | BEAR enrichment         | 2 | CCR5        | S516 | N712 |
| 118 | dCBE           | No enrichment           | 3 | CCR5        | S516 | N714 |
| 119 | dCBE           | Transfection enrichment | 3 | CCR5        | S516 | N715 |
| 120 | dCBE           | BEAR enrichment         | 3 | CCR5        | S518 | N701 |
| 121 | no base editor | N/A                     | 1 | CCR5        | S518 | N702 |
| 122 | no base editor | N/A                     | 2 | CCR5        | S518 | N703 |
| 123 | no base editor | N/A                     | 3 | CCR5        | S518 | N704 |
| 124 | CBE            | No enrichment           | 1 | FANCF-SITE2 | S518 | N705 |
| 125 | CBE            | No enrichment           | 2 | FANCF-SITE2 | S518 | N706 |
| 126 | CBE            | No enrichment           | 3 | FANCF-SITE2 | S518 | N707 |
| 127 | dCBE           | No enrichment           | 1 | FANCF-SITE2 | S518 | N710 |
| 128 | dCBE           | Transfection enrichment | 1 | FANCF-SITE2 | S518 | N711 |
| 129 | dCBE           | BEAR enrichment         | 1 | FANCF-SITE2 | S518 | N712 |
| 130 | dCBE           | No enrichment           | 2 | FANCF-SITE2 | S518 | N714 |
| 131 | dCBE           | Transfection enrichment | 2 | FANCF-SITE2 | S518 | N715 |
| 132 | dCBE           | BEAR enrichment         | 2 | FANCF-SITE2 | S520 | N701 |
| 133 | dCBE           | No enrichment           | 3 | FANCF-SITE2 | S520 | N702 |
| 134 | dCBE           | Transfection enrichment | 3 | FANCF-SITE2 | S520 | N703 |
| 135 | dCBE           | BEAR enrichment         | 3 | FANCF-SITE2 | S520 | N704 |
| 136 | no base editor | N/A                     | 1 | FANCF-SITE2 | S520 | N705 |
| 137 | no base editor | N/A                     | 2 | FANCF-SITE2 | S520 | N706 |
| 138 | no base editor | N/A                     | 3 | FANCF-SITE2 | S520 | N707 |
| 139 | ABE            | No enrichment           | 1 | SCN5a       | S520 | N710 |
| 140 | ABE            | Transfection enrichment | 1 | SCN5a       | S520 | N711 |
| 141 | ABE            | BEAR enrichment         | 1 | SCN5a       | S520 | N712 |
| 142 | ABE            | No enrichment           | 2 | SCN5a       | S520 | N714 |
| 143 | ABE            | Transfection enrichment | 2 | SCN5a       | S520 | N715 |
| 144 | ABE            | BEAR enrichment         | 2 | SCN5a       | S521 | N701 |
| 145 | ABE            | No enrichment           | 3 | SCN5a       | S521 | N702 |
| 146 | ABE            | Transfection enrichment | 3 | SCN5a       | S521 | N703 |
| 147 | ABE            | BEAR enrichment         | 3 | SCN5a       | S521 | N704 |
| 148 | dABE           | No enrichment           | 1 | SCN5a       | S521 | N705 |
| 149 | dABE           | Transfection enrichment | 1 | SCN5a       | S521 | N706 |
| 150 | dABE           | BEAR enrichment         | 1 | SCN5a       | S521 | N707 |
| 151 | dABE           | No enrichment           | 2 | SCN5a       | S521 | N710 |
| 152 | dABE           | Transfection enrichment | 2 | SCN5a       | S521 | N711 |
| 153 | dABE           | BEAR enrichment         | 2 | SCN5a       | S521 | N712 |
| 154 | dABE           | No enrichment           | 3 | SCN5a       | S521 | N714 |
| 155 | dABE           | Transfection enrichment | 3 | SCN5a       | S521 | N715 |
| 156 | dABE           | BEAR enrichment         | 3 | SCN5a       | S522 | N701 |
| 157 | CBE            | No enrichment           | 1 | SCN5a       | S522 | N702 |
| 158 | CBE            | No enrichment           | 2 | SCN5a       | S522 | N703 |
| 159 | CBE            | No enrichment           | 3 | SCN5a       | S522 | N704 |
| 160 | dCBE           | No enrichment           | 1 | SCN5a       | S522 | N705 |
| 161 | dCBE           | Transfection enrichment | 1 | SCN5a       | S522 | N706 |
| 162 | dCBE           | BEAR enrichment         | 1 | SCN5a       | S522 | N707 |
| 163 | dCBE           | No enrichment           | 2 | SCN5a       | S522 | N710 |
| 164 | dCBE           | Transfection enrichment | 2 | SCN5a       | S522 | N711 |
| 165 | dCBE           | BEAR enrichment         | 2 | SCN5a       | S522 | N712 |
| 166 | dCBE           | No enrichment           | 3 | SCN5a       | S522 | N714 |
| 167 | dCBE           | Transfection enrichment | 3 | SCN5a       | S522 | N715 |
| 168 | dCBE           | BEAR enrichment         | 3 | SCN5a       | S513 | N701 |

|     |                |     |   |       |      |      |
|-----|----------------|-----|---|-------|------|------|
| 169 | no base editor | N/A | 1 | SCN5a | S513 | N702 |
| 170 | no base editor | N/A | 2 | SCN5a | S513 | N703 |
| 171 | no base editor | N/A | 3 | SCN5a | S513 | N704 |
